# Supplementary material for: Domino condensation–heterocyclisation reactions: iodine catalyzed four component synthesis of 1,3-thiazine
Source: Royal Society of Chemistry journal article supplement (doi:10.1039/c3ra45454a), 2013-12-02
Supplement: c3ra45454a.pdf [file c3ra45454a.pdf]

## Supporting information

### Domino condensation/Heterocyclisation reactions: Iodine catalyzed four component synthesis of 1, 3-thiazine

*Munusamy Sathishkumar, Kulathu Iyer Sathiyarayanan\**

*Chemistry Division, School of Advanced sciences, Vellore Institute of Technology, Vellore-632014, Tamilnadu India.  
Fax: (+914162243092)  
E-mail: [sathiya\\_kuna@hotmail.com](mailto:sathiya_kuna@hotmail.com).*

#### Table of contents

|                                                                                      |       |
|--------------------------------------------------------------------------------------|-------|
| General procedure -----                                                              | 2     |
| Experimental -----                                                                   | 2-8   |
| Copies of <sup>1</sup> H NMR, <sup>13</sup> C NMR spectrum and HPLC of (4a-4q) ----- | 10-43 |

## General procedure

All reactions were carried out in oven-dried glassware. Analytical grade solvents and commercially available reagents were purchased from commercial sources and used directly without further purification unless otherwise stated. Thin-layer chromatography (TLC) was carried out on glass silica gel plates which were iodinated by Iodine chamber.  $^1\text{H-NMR}$  and  $^{13}\text{C-NMR}$  spectra were recorded at room temperature using Bruker ( $^1\text{H-NMR}$  at 400MHz and  $^{13}\text{C-NMR}$  at 100 MHz). Chemical shifts are reported in ppm with reference to solvent signals [ $^1\text{H-NMR}$ :  $\text{CDCl}_3$  (7.26ppm);  $^{13}\text{C-NMR}$ :  $\text{CDCl}_3$  (77.16ppm)]. Signal patterns are indicated as s, singlet; d, doublet; t, triplet; q, quartet and m, multiplet. High Resolution Mass (HRMS) analysis was obtained using JEOL GCMATE II GC-MASS SPECTROMETER (Electron impact ionization) and reported as m/z (relative intensity) for the molecular ion [M]. HPLC analysis was carried out with Waters manual injector HPLC system.

## Experimental

A mixture of 2-chlorobenzaldehyde (4mmol) and  $\beta$ -naphthol (4mmol) were mixed in a 50ml two necked round bottom flask containing acetonitrile (7ml) solvent. To this reaction mixture 20mol% Iodine and four granules of 4 Å molecular sieve were added and refluxed. After 10minutes a mixture of  $\text{CS}_2$  (4mmol) and aniline (4mmol) in 3ml ethanol and KOH (8mmol) was added in RB flask. The reaction mixture was allowed to reflux for 4h. The completion of the reaction was monitored with TLC. After the completion of the reaction the reaction mixture was quenched with 20% solution of sodium thiosulfate and extracted with ethyl acetate. The combined organic layer was dried over sodium sulfate and concentrated by evaporation and settled white product was dried. Some of the derivatives which are obtained like gels were purified by column chromatography on silica gel (60-120mesh, ethyl acetate/n-hexane).

## Characterization data and HPLC data conditions of compounds 4.

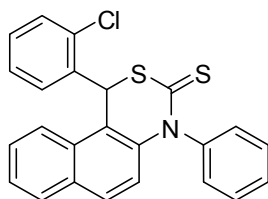

**1-(2-chlorophenyl)-4-phenyl-1H-naphtho [2, 1-d][1,3]thiazine-3(4H)-thione (4a).** White color powder; Melting point: 210-212 °C; The purity was determined by HPLC analysis using a Symmetry C18 5 $\mu$  4.6 x 100mm HPLC column ( 50/50 Acetonitrile/ water; flow rate: 0.5ml/min;  $\lambda$  = 254nm; tR = 2.5min);  $^1\text{H NMR}$  (400 MHz,  $\text{CDCl}_3$ )  $\delta$  7.97-7.95 (d, J= 8Hz, 1H), 7.82-7.77 (t, J= 10 Hz,1H), 7.75-7.73 (d, J=7.2 Hz, 1H), 7.56-7.54 (d, J= 8Hz, 1H), 7.41(m, 2H), 7.41(m, 2H), 7.332 (bs, 3H), 7.295-7.258(t, J= 6.4Hz,1H), 7.122-7.084(t, J=7.6Hz, 1H), 7.050-7.016(t, J= 6.4Hz, 1H), 6.10(s, 1H) 6.05(s, 1H)  $^{13}\text{C NMR}$  (100 MHz,  $\text{CDCl}_3$ )  $\delta$  160.5, 153.1, 139.6, 137.3, 136.2, 134.3, 133.0, 131.8, 131.4, 130.3, 129.9, 129.6, 129.2, 128.7, 127.6, 127.1, 126.4, 123.6,

122.9, 121.6, 120.2, 119.1, 113.5, 52.4; EI- MS m/z 417 ( $M^+$ ); HRMS (EI) calcd for  $C_{24}H_{16}ClNS_2(M^+)$  417.0413, found 417.0415.

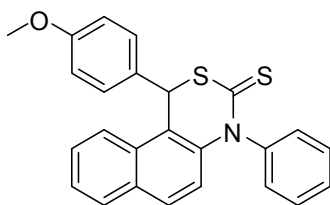

**1-(4-methoxyphenyl)-4-phenyl-1H-naphtho [2, 1-d][1,3]thiazine-3(4H)-thione (4b).** White color powder; Melting point: 202-204 °C; The purity was determined by HPLC analysis using a Symmetry C18 5 $\mu$  4.6 x 100mm HPLC column ( 50/50 Acetonitrile/ water; flow rate: 0.5ml/min;  $\lambda$  = 254nm; tR = 7.5min);  $^1H$  NMR (400 MHz,  $CDCl_3$ )  $\delta$  7.88-7.76 (m, 3H), 7.71-7.69(d, J=8Hz, 1H), 7.46 – 7.32(m, 8H), 7.189(s, 1H) 7.14-7.12(d, J=8Hz, 2H), 5.36(s, 1H), 1.67(s, 3H);  $^{13}C$  NMR (100 MHz,  $CDCl_3$ )  $\delta$  153.5, 137.1, 134.7, 129.9, 129.7, 129.3, 129.2, 129.0, 127.8, 127.3, 126.6, 126.4, 125.4, 123.6, 117.9, 117.6, 114.4, 109.6, 55.7, 31. EI- MS m/z 413 ( $M^+$ ); HRMS (EI) calcd for  $C_{25}H_{19}NOS_2(M^+)$  413.0908, found 413.0911.

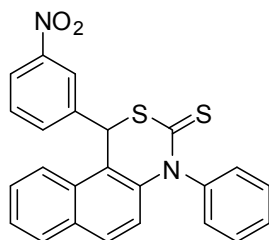

**1-(3-nitrophenyl)-4-phenyl-1H-naphtho [2, 1-d][1,3]thiazine-3(4H)-thione (4c).** White color powder; Melting point: 196-198 °C; The purity was determined by HPLC analysis using a Symmetry C18 5 $\mu$  4.6 x 100mm HPLC column ( 50/50 Acetonitrile/ water; flow rate: 0.5ml/min;  $\lambda$  = 254nm; tR = 5.0min);  $^1H$  NMR (400 MHz,  $CDCl_3$ )  $\delta$  8.50 (s, 1H), 8.33 (s, 1H), 8.23- 8.21 (d, J= 8Hz, 1H), 8.18-8.16 (d, J=8Hz, 1H), 7.94-7.92(d, J=8Hz, 1H) 7.87- 7.83(t, J= 9.2Hz, 2H), 7.67- 7.66(d, J= 6.4Hz, 1H), 7.60- 7.56(t, J= 7.6Hz, 1H), 7.52- 7.48(t, J= 7.6Hz, 1H), 7.36- 7.35 (d, J= 5.6Hz , 2H), 7.31- 7.29 (d, J= 8Hz, 1H), 7.26 (s,1H), 5.75(s, 1H), 5.66-5.63(d, J=8Hz, 1H);  $^{13}C$  NMR (100 MHz,  $CDCl_3$ )  $\delta$  152.2, 148.7, 148.4, 144.6, 140.6, 135.6, 132.7, 131.3, 130.4, 129.5, 129.3, 129.0, 127.3, 124.3, 124.1, 123.7, 123.0, 122.4, 121.5, 119.3, 112.9, 81.0, 53.5; EI- MS m/z 428 ( $M^+$ ); HRMS (EI) calcd for  $C_{24}H_{16}N_2O_2S_2(M^+)$  428.0653, found 428.0650.

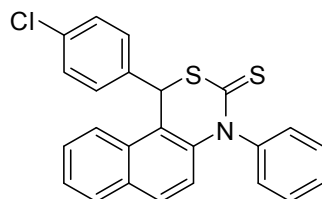

**1-(4-chlorophenyl)-4-phenyl-1H-naphtho [2, 1-d][1,3]thiazine-3(4H)-thione (4d).** White color powder; Melting point: 215-217 °C; The purity was determined by HPLC analysis using a Symmetry C18 5 $\mu$  4.6 x 100mm HPLC column ( 50/50 Acetonitrile/ water; flow rate: 0.5ml/min;  $\lambda$  = 254nm; tR = 4.0min); <sup>1</sup>H NMR (400 MHz, CDCl<sub>3</sub>)  $\delta$  7.81-7.78(m, 2H), 7.78(s, 1H), 7.52-7.50(d, J=8Hz, 2H) 7.36(bs, 1H), 7.34-7.34(d, J= 2Hz, 2H), 7.29(bs, 3H), 7.27(s,1H)7.23-7.21(d,J=8Hz, 2H), 5.61(s, 1H), 5.59(s, 1H) <sup>13</sup>C NMR (100 MHz, CDCl<sub>3</sub>)  $\delta$  152.4, 141.2, 137.5, 134.5, 133.4, 131.6, 130.8, 130.1, 129.7, 129.2, 129.0, 128.9, 128.7, 128.6, 127.7, 126.9, 123.7, 122.8, 119.3, 114.0, 81.8, 53.5; EI- MS m/z 417 (M<sup>+</sup>); HRMS (EI) calcd for C<sub>24</sub>H<sub>16</sub>ClNS<sub>2</sub> (M<sup>+</sup>) 417.0413, found 417.0416.

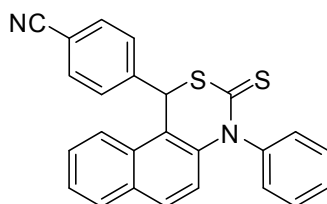

**1-(4-cyanophenyl)-4-phenyl-1H-naphtho [2, 1-d][1,3]thiazine-3(4H)-thione (4e).** White color powder; Melting point: 212-214 °C; The purity was determined by HPLC analysis using a Symmetry C18 5 $\mu$  4.6 x 100mm HPLC column ( 50/50 Acetonitrile/ water; flow rate: 0.5ml/min; 254nm; tR=7.5 min); <sup>1</sup>H NMR (400 MHz, CDCl<sub>3</sub>)  $\delta$  7.86-7.84(d, J= 8Hz,2H), 7.74-7.71(m,3H), 7.65-7.63(d, 2H), 7.52-7.50(d, J= 8Hz, 1H), 7.39-7.36(m, 4H), 7.28-7.27(d, J= 2Hz, 2H), 5.70(s, 1H), 5.58 (s, 1H); <sup>13</sup>C NMR (100 MHz, CDCl<sub>3</sub>)  $\delta$  152.0, 147.5, 143.4, 132.9, 132.8, 132.3, 132.2, 131.3, 130.1, 129.1, 129.0, 128.8, 127.2, 127.0, 123.9, 122.4, 119.1, 118.6, 112.9, 112.5, 111.6, 81.4, 53.6 ; EI- MS m/z 408 (M<sup>+</sup>); HRMS (EI) calcd for C<sub>25</sub>H<sub>16</sub>N<sub>2</sub>S<sub>2</sub> (M<sup>+</sup>) 408.0755, found 408.0757.

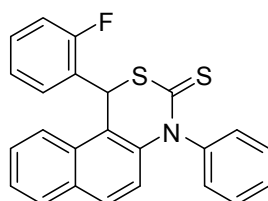

**1-(2-fluorophenyl)-4-phenyl-1H-naphtho [2, 1-d][1,3]thiazine-3(4H)-thione (4f).** White color powder; Melting point: 206-208 °C; The purity was determined by HPLC analysis using a Symmetry C18 5 $\mu$  4.6 x 100mm HPLC column ( 50/50 Acetonitrile/ water; flow rate: 0.5ml/min;

$\lambda = 254\text{nm}$ ;  $t_R = 3.9\text{ min}$ );  $^1\text{H NMR}$  (400 MHz,  $\text{CDCl}_3$ )  $\delta$  7.93-7.91(d,  $J=5.6\text{Hz}$ , 1H), 7.81(bs, 2H), 7.60-7.59(d,  $J=5.6\text{Hz}$ , 1H), 7.36-7.35(d,  $J=4.8\text{Hz}$ , 4H), 7.26-7.22(t,  $J=5.6\text{Hz}$ , 3H) 7.0(bs, 2H), 6.92-6.91(d,  $J=4.4\text{Hz}$ , 1H), 6.09-6.03(dd,  $J=4.8\text{Hz}$ ,  $J=16.8\text{Hz}$ , 1H)  $^{13}\text{C NMR}$  (100 MHz,  $\text{CDCl}_3$ )  $\delta$  157.3, 153.1, 131.3, 130.6, 130.0, 129.9, 129.6, 129.2, 128.9, 128.7, 128.1, 127.0, 126.9, 124.4, 123.6, 122.7, 119.2, 116.1, 115.9, 115.8, 112.8, 78.9, 48.7; EI- MS  $m/z$  401 ( $\text{M}^+$ ); HRMS (EI) calcd for  $\text{C}_{24}\text{H}_{16}\text{FNS}_2$  ( $\text{M}^+$ ) 401.0708, found 401.0706.

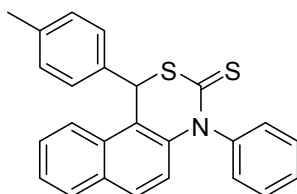

**1-(4-methylphenyl)-4-phenyl-1H-naphtho [2, 1-d][1,3]thiazine-3(4H)-thione (4g).** White color powder; Melting point: 192-194  $^{\circ}\text{C}$ ; The purity was determined by HPLC analysis using a Symmetry C18  $5\mu$  4.6 x 100mm HPLC column ( 50/50 Acetonitrile/ water; flow rate: 0.5ml/min;  $\lambda = 254\text{nm}$ ;  $t_R = 3.9\text{min}$ );  $^1\text{H NMR}$  (400 MHz,  $\text{CDCl}_3$ )  $\delta$  7.88-7.87(d,  $J=6\text{Hz}$ , 1H), 7.81-7.79(d,  $J=8.8\text{Hz}$ , 2H), 7.70(s, 1H), 7.46(s, 2H), 7.33-7.23(m, 5H), 7.13(bs, 2H), 6.43(s, 1H), 5.71(s, 1H), 5.66(s, 1H) 2.42-2.31(bs, 3H);  $^{13}\text{C NMR}$  (100 MHz,  $\text{CDCl}_3$ )  $\delta$  161.7, 155.5, 152.6, 142.7, 140.0, 138.5, 137.5, 137.0, 136.4, 132.0, 131.8, 129.9, 129.2, 128.9, 127.8, 126.7, 123.7, 122.9, 122.7, 120.4, 119.5, 116.5, 116.4, 114.7, 54.0, 21.3. EI- MS  $m/z$  397 ( $\text{M}^+$ ); HRMS (EI) calcd for  $\text{C}_{25}\text{H}_{19}\text{NS}_2$  ( $\text{M}^+$ ) 397.0959, found 397.0956.

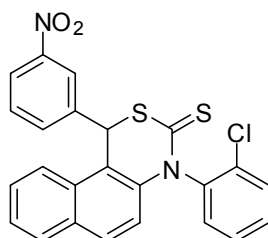

**4-(2-chlorophenyl)-1-(3-nitrophenyl)-1H-naphtho[2, 1-d][1,3]thiazine-3(4H)-thione (4h).** White color powder; Melting point: 223-225  $^{\circ}\text{C}$ ; The purity was determined by HPLC analysis using a Symmetry C18  $5\mu$  4.6 x 100mm HPLC column ( 50/50 Acetonitrile/ water; flow rate: 0.5ml/min;  $\lambda = 254\text{nm}$ ;  $t_R = 5.9\text{min}$ );  $^1\text{H NMR}$  (400 MHz,  $\text{CDCl}_3$ )  $\delta$  8.50 (bs, 1H), 8.33(bs, 1H), 8.22-8.17(m, 1H), 7.93-7.85(m, 3H), 7.66 -7.50(m, 3H), 7.36-7.29(m, 4H), 5.75(s, 1H), 5.64(s, 1H);  $^{13}\text{C NMR}$  (100 MHz,  $\text{CDCl}_3$ )  $\delta$  152.1, 148.6, 148.3, 144.5, 140.5, 135.4, 132.6, 131.2, 130.3, 129.4, 129.2, 128.9, 127.2, 124.2, 123.6, 123.4, 122.8, 122.3, 121.4, 119.2, 112.8, 80.9, 53.4. EI- MS  $m/z$  462 ( $\text{M}^+$ ); HRMS (EI) calcd for  $\text{C}_{24}\text{H}_{15}\text{ClNO}_2\text{S}_2$  ( $\text{M}^+$ ) 462.0263, found 462.0263.

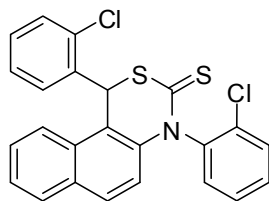

**4-(2-chlorophenyl)-1-(2-chlorophenyl)-1H-naphtho[2,1-d][1,3]thiazine-3(4H)-thione(4i).**

White color powder; Melting point: 220-222 °C; The purity was determined by HPLC analysis using a Symmetry C18 5 $\mu$  4.6 x 100mm HPLC column ( 50/50 Acetonitrile/ water; flow rate: 0.5ml/min;  $\lambda$  = 254nm; tR = 2.6min); <sup>1</sup>H NMR (400 MHz, CDCl<sub>3</sub>)  $\delta$  7.93(bs, 1H), 7.78(m, 4H), 7.53(s, 1H), 7.40-7.31(m, 5H), 7.08(bs, 1H), 7.01(bs, 1H), 6.08(s, 1H), 6.03(s,1H) <sup>13</sup>C NMR (100 MHz, CDCl<sub>3</sub>)  $\delta$  153.1, 139.5, 136.2, 132.9, 131.3, 130.3, 130.1, 129.9, 129.6, 129.2, 129.1, 128.7, 127.6, 127.1, 126.9, 126.4, 123.6, 122.9, 119.1, 113.5 EI- MS m/z 451 (M<sup>+</sup>); HRMS (EI) calcd for C<sub>24</sub>H<sub>15</sub>Cl<sub>2</sub>NS<sub>2</sub> (M<sup>+</sup>) 451.0023, found 451.0026.

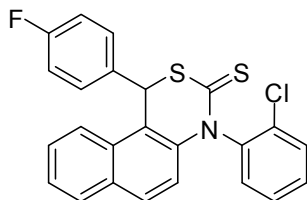

**4-(2-chlorophenyl)-1-(4-fluorophenyl)-1H-naphtho[2,1-d][1,3]thiazine-3(4H)-thione (4j).**

White color powder; Melting point: 215-217 °C; The purity was determined by HPLC analysis using a Symmetry C18 5 $\mu$  4.6 x 100mm HPLC column ( 50/50 Acetonitrile/ water; flow rate: 0.5ml/min;  $\lambda$  = 254nm; tR = 3.9min); <sup>1</sup>H NMR (400 MHz, CDCl<sub>3</sub>)  $\delta$  7.88(bs, 1H), 7.78-7.77(d, J= 4Hz, 2H), 7.56(bs, 1H), 7.31-7.19(m,5H), 7.12-7.10(d, J= 7.6Hz, 1H), 7.07-7.02(t, J= 10.8, 1H), 6.96(s, 1H), 6.87(s, 1H), 6.04(s, 1H), 5.99(s, 1H); <sup>13</sup>C NMR (100 MHz, CDCl<sub>3</sub>)  $\delta$  153.1, 133.9, 131.6, 130.6, 129.6, 129.7, 128.9, 128.1, 127.0, 126.4, 125.9, 124.9, 124.4, 123.7, 122.7, 121.3, 120.3, 119.2, 116.4, 115.9, 114.7, 112.8, 78.9, 48.7; EI- MS m/z 435 (M<sup>+</sup>); HRMS (EI) calcd for C<sub>24</sub>H<sub>15</sub>ClFNS<sub>2</sub> (M<sup>+</sup>) 435.0318, found 435.0319.

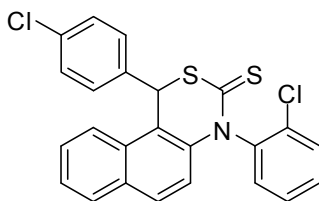

**4-(2-chlorophenyl)-1-(4-chlorophenyl)-1H-naphtho[2,1-d][1,3]thiazine-3(4H)-thione (4k).**

White color powder; Melting point: 225-227 °C; The purity was determined by HPLC analysis using a Symmetry C18 5 $\mu$  4.6 x 100mm HPLC column ( 50/50 Acetonitrile/ water; flow rate:

0.5ml/min;  $\lambda = 254\text{nm}$ ;  $t_R = 5.1\text{min}$ );  $^1\text{H NMR}$  (400 MHz,  $\text{CDCl}_3$ )  $\delta$  7.88(bs, 1H), 7.78(bs, 1H), 7.56(bs, 1H), 7.46-7.40(m, 1H) 7.32(bs, 2H), 7.26-7.20(m, 4H), 7.05-7.0(t,  $J=10.8\text{Hz}$ , 1H), 6.96(bs, 1H), 6.88(bs, 1H), 6.04(s, 1H)-6.00(s 1H);  $^{13}\text{C NMR}$  (100 MHz,  $\text{CDCl}_3$ )  $\delta$  161.1, 159.5, 157.2, 156.0, 153.0, 131.5, 131.2, 130.5, 129.8, 129.7, 129.1, 128.8, 128.0, 127.9, 126.9, 125.8, 122.9, 121.2, 120.2, 119.4, 115.9, 112.7, 48.6; ; EI- MS  $m/z$  417 ( $\text{M}^+$ ); HRMS (EI) calcd for  $\text{C}_{24}\text{H}_{15}\text{Cl}_2\text{NS}_2$  ( $\text{M}^+$ ) 417.0413, found 417.0415.

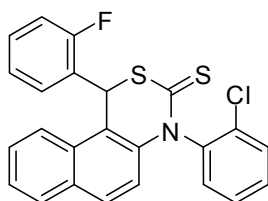

**4-(2-chlorophenyl)-1-(4-chlorophenyl)-1H-naphtho[2, 1-d][1,3]thiazine-3(4H)-thione (4l).**

White color powder; Melting point: 206-208  $^{\circ}\text{C}$ ; The purity was determined by HPLC analysis using a Symmetry C18  $5\mu$  4.6 x 100mm HPLC column ( 50/50 Acetonitrile/ water; flow rate: 0.5ml/min;  $\lambda = 254\text{nm}$ ;  $t_R = 3.8\text{min}$ );  $^1\text{H NMR}$  (400 MHz,  $\text{CDCl}_3$ )  $\delta$  7.90- 7.86(t,  $J= 7.6\text{Hz}$ , 1H), 7.79-7.78(d,  $J= 2.8\text{Hz}$ , 1H), 7.77(bs, 1H), 7.58-7.54(t,  $J= 14.8\text{Hz}$ , 1H), 7.34-7.31(t,  $J= 6.8\text{Hz}$ , 5H), 7.21(s, 1H), 7.19(s, 1H), 7.17(s, 1H), 6.97-6.96(t,  $J= 2.4\text{Hz}$ , 1H), 6.05(s, 1H), 6.0(s, 1H);  $^{13}\text{C NMR}$  (100 MHz,  $\text{CDCl}_3$ )  $\delta$  153.2, 134.0, 133.9, 131.4, 130.6, 130.0, 129.9, 129.0, 128.7, 128.1, 127.5, 126.0, 125.1, 124.8, 123.8, 122.7, 121.4, 119.5, 116.3, 116.0, 114.8, 79.0, 48.8 EI- MS  $m/z$  435 ( $\text{M}^+$ ); HRMS (EI) calcd for  $\text{C}_{24}\text{H}_{15}\text{Cl}_2\text{FNS}_2$  ( $\text{M}^+$ ) 435.0318, found 435.0317.

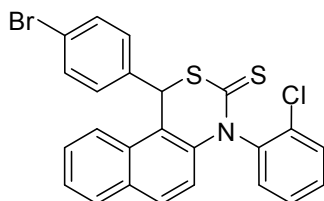

**4-(2-chlorophenyl)-1-(4-bromophenyl)-1H-naphtho[2, 1-d][1,3]thiazine-3(4H)-thione (4m).**

White color powder; Melting point: 219-220  $^{\circ}\text{C}$ ; The purity was determined by HPLC analysis using a Symmetry C18  $5\mu$  4.6 x 100mm HPLC column ( 50/50 Acetonitrile/ water; flow rate: 0.5ml/min;  $\lambda = 254\text{nm}$ ;  $t_R = 3.8\text{min}$ );  $^1\text{H NMR}$  (400 MHz,  $\text{CDCl}_3$ )  $\delta$  7.81-7.78(m, 2H), 7.52-7.51(d,  $J= 2.8\text{Hz}$ , 1H), 7.50(s, 1H), 7.45- 7.42(m, 3H), 7.33-7.32(m, 3H), 7.25- 7.21(m, 3H), 5.58(s, 1H), 5.57(s, 1H);  $^{13}\text{C NMR}$  (100 MHz,  $\text{CDCl}_3$ )  $\delta$  161.3, 152.2, 141.6, 137.9, 132.3, 132.0, 131.5, 131.4, 131.1, 130.2, 129.8, 129.6, 129.2, 128.9, 128.0, 127.9, 126.8, 123.6, 122.7, 122.6, 121.5, 119.2, 113.7, 81.7, 53.4; 5 EI- MS  $m/z$  494 ( $\text{M}^+$ ); HRMS (EI) calcd for  $\text{C}_{24}\text{H}_{15}\text{BrClNS}_2$  ( $\text{M}^+$ ) 494.9518, found 494.9517.

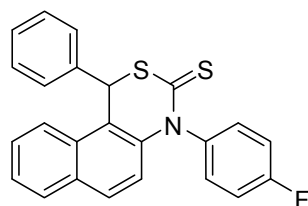

**4-(4-fluorophenyl)-1-phenyl-1H-naphtho[2, 1-d][1,3]thiazine-3(4H)-thione (4n).** White color powder; Melting point: 202-205 °C; The purity was determined by HPLC analysis using a Symmetry C18 5 $\mu$  4.6 x 100mm HPLC column ( 50/50 Acetonitrile/ water; flow rate: 0.5ml/min;  $\lambda$  = 254nm; tR = 2.5min); <sup>1</sup>H NMR (400 MHz, CDCl<sub>3</sub>)  $\delta$  7.80(s, 1H), 7.68(s, 1H), 7.64-7.62(d, J=8Hz, 1H), 7.64-7.62(d, J=8Hz, 2H), 7.58-7.56 (d, J=8Hz, 2H), 7.49-7.47 (d, J=8Hz, 2H), 7.35-7.33 (m, 3H), 7.23-(s, 1H), 7.10(bs, 1H), 5.66(s, 1H), 5.61(s, 1H); <sup>13</sup>C NMR (100 MHz, CDCl<sub>3</sub>)  $\delta$  153.4, 152.2, 146.3, 142.5, 131.4, 129.8, 129.7, 128.7, 127.7, 127.0, 126.6, 126.5, 126.3, 123.7, 122.6, 119.2, 117.7, 113.5, 109.4, 81.7, 53.6; EI- MS m/z 401 (M<sup>+</sup>); HRMS (EI) calcd for C<sub>24</sub>H<sub>16</sub>FNS<sub>2</sub> (M<sup>+</sup>) 401.0708, found 401.0711.

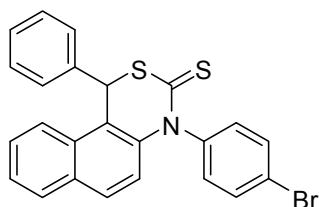

**4-(4-bromophenyl)-1-phenyl-1H-naphtho[2, 1-d][1,3]thiazine-3(4H)-thione (4o).** White color powder; Melting point: 214-216 °C; The purity was determined by HPLC analysis using a Symmetry C18 5 $\mu$  4.6 x 100mm HPLC column ( 50/50 Acetonitrile/ water; flow rate: 0.5ml/min;  $\lambda$  = 254nm; tR = 3.7min); <sup>1</sup>H NMR (400 MHz, CDCl<sub>3</sub>)  $\delta$  7.84-7.82(d, J=8Hz, 2H), 7.72-7.66(q, J=8Hz, 4H), 7.62-7.60(d, J=8Hz, 2H), 7.50-7.48(d, J=8Hz, 2H), 7.36-7.35(m, 2H), 7.26-7.50(d, J=4Hz, 2H), 5.67(s, 1H), 5.56(s, 1H); <sup>13</sup>C NMR (100 MHz, CDCl<sub>3</sub>)  $\delta$  152.0, 147.5, 143.4, 132.3, 132.2, 131.3, 130.1, 129.1, 128.8, 127.2, 127.0, 123.9, 122.4, 119.1, 118.6, 118.5, 113.0, 112.5, 111.6, 81.4, 53.6; EI- MS m/z 460 (M<sup>+</sup>); HRMS (EI) calcd for C<sub>24</sub>H<sub>16</sub>BrNS<sub>2</sub> (M<sup>+</sup>) 460.9908, found 460.9904.

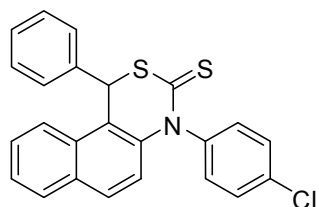

**4-(4-chlorophenyl)-1-phenyl-1H-naphtho[2, 1-d][1,3]thiazine-3(4H)-thione (4p).** White color powder; Melting point: 210-212 °C; The purity was determined by HPLC analysis using a Symmetry C18 5 $\mu$  4.6 x 100mm HPLC column ( 50/50 Acetonitrile/ water; flow rate: 0.5ml/min;  $\lambda$  = 254nm; tR = 5.1min); <sup>1</sup>H NMR (400 MHz, CDCl<sub>3</sub>)  $\delta$  7.78-7.76(m, 3H), 7.56-7.55(d, J=4Hz,



1H), 7.39-7.36 (m, 4H), 7.32- 7.28 (m, 4H), 7.26- 7.22 (q, J=8Hz, 2H), 5.69 (s, 1H), 5.66(s, 1H); <sup>13</sup>C NMR (100 MHz, CDCl<sub>3</sub>) δ 162.0, 152.5, 142.7, 139.1, 132.0, 131.7, 129.3, 129.2, 128.9, 128.5, 128.4, 128.3, 127.5, 127.3, 126.6, 126.3, 122.9, 121.5, 119.3, 114.4, 82.4, 54.1; EI- MS m/z 417 (M<sup>+</sup>); HRMS (EI) calcd for C<sub>24</sub>H<sub>16</sub>ClNS<sub>2</sub> (M<sup>+</sup>) 417.0413, found 417.0416.

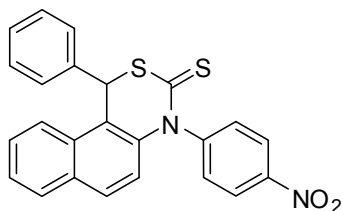

**4-(4-chlorophenyl)-1-phenyl-1H-naphtho[2, 1-d][1,3]thiazine-3(4H)-thione (4q).** White color powder; Melting point: 218-220 °C; The purity was determined by HPLC analysis using a Symmetry C18 5μ 4.6 x 100mm HPLC column ( 50/50 Acetonitrile/ water; flow rate: 0.5ml/min; λ = 254nm; tR = 9.1min); <sup>1</sup>H NMR (400 MHz, CDCl<sub>3</sub>) δ 8.26-8.24(d, J=8Hz, 2H), 8.20-8.18(d, J=8Hz, 2H), 7.87-7.77(m, 2H), 7.80(s, 1H), 7.77(s, 1H), 7.58-7.56(d, J=8Hz, 2H), 7.38-7.36(d, J=8Hz, 2H), 7.29-7.27(d, J=8Hz, 2H), 5.74(s, 1H), 5.62(s, 1H); <sup>13</sup>C NMR (100 MHz, CDCl<sub>3</sub>) δ 159.8, 152.0, 149.3, 148.1, 147.4, 145.2, 131.2, 130.3, 130.2, 129.5, 129.1, 128.9, 127.3, 127.2, 124.0, 123.7, 123.5, 122.3, 119.1, 112.9, 81.3, 53.4; EI- MS m/z 428 (M<sup>+</sup>); HRMS (EI) calcd for C<sub>24</sub>H<sub>16</sub>N<sub>2</sub>S<sub>2</sub>O<sub>2</sub> (M<sup>+</sup>) 428.0653, found 428.0650.

## NMR spectra

### <sup>1</sup>H NMR of compound (4a):

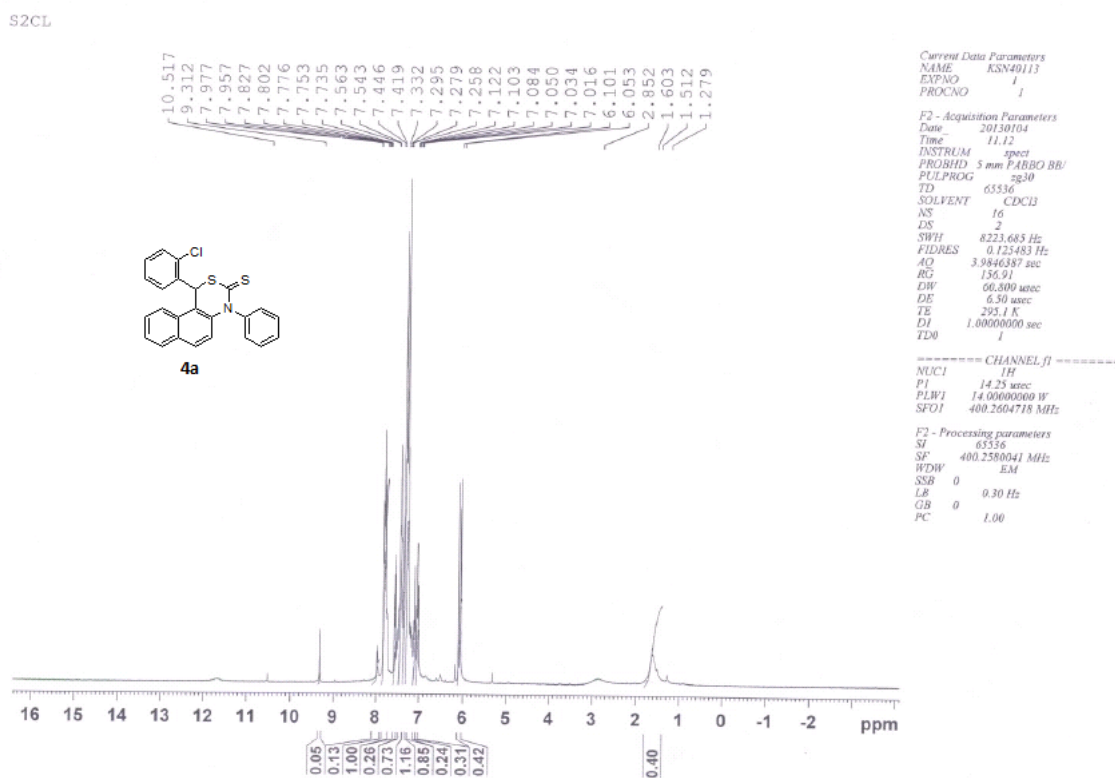

### <sup>13</sup>C NMR of compound (4a):

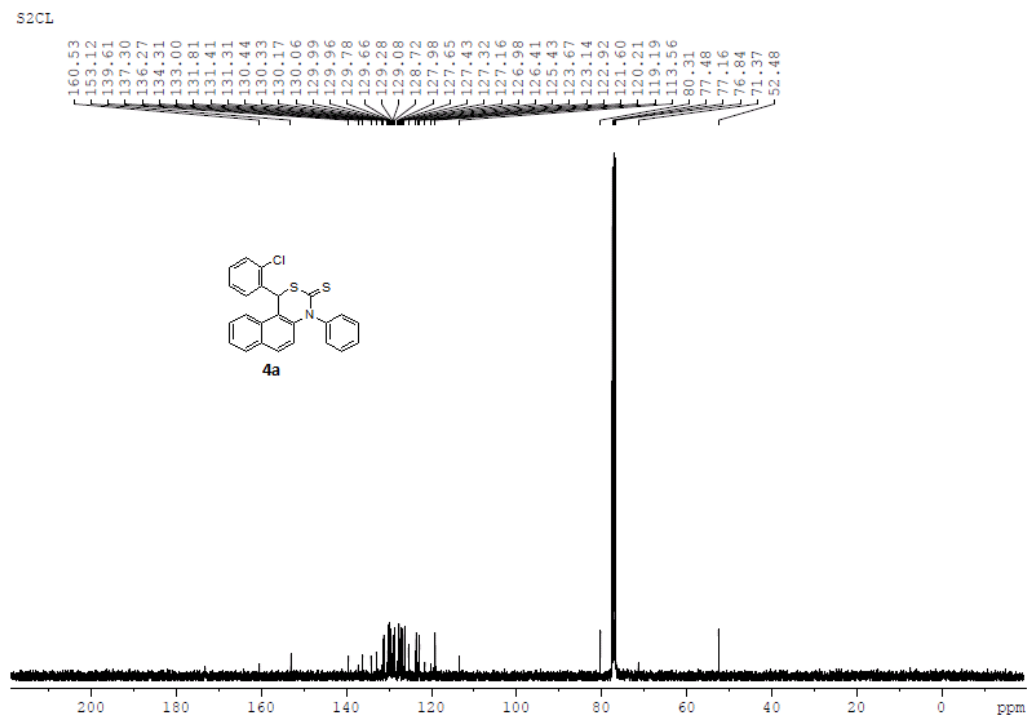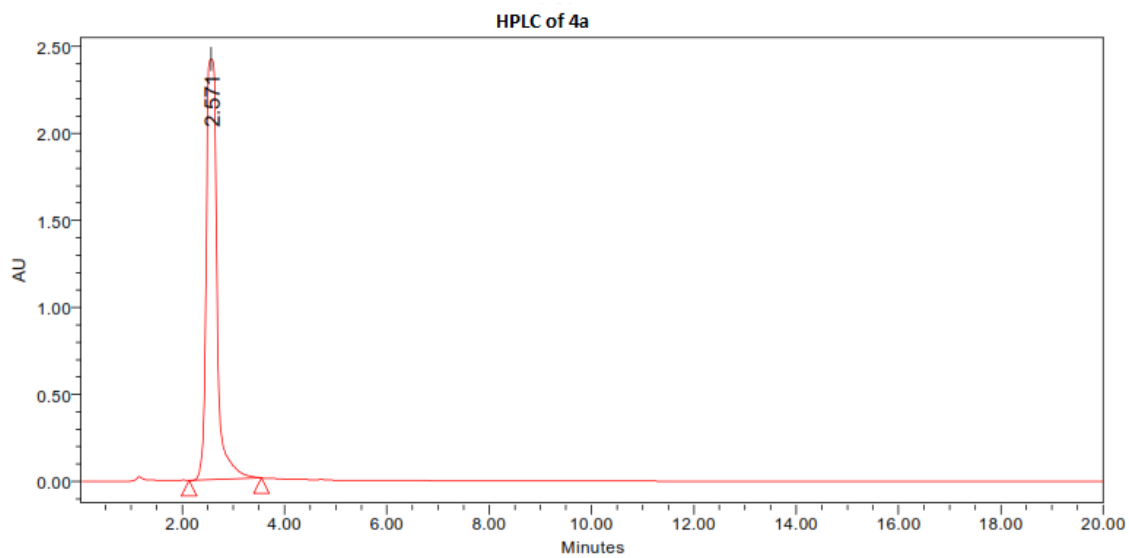

#### Peak Results

| Name | RT    | % Area | Area     |
|------|-------|--------|----------|
| 1    | 2.571 | 100.00 | 35514687 |



### <sup>13</sup>C NMR of compound (4b):

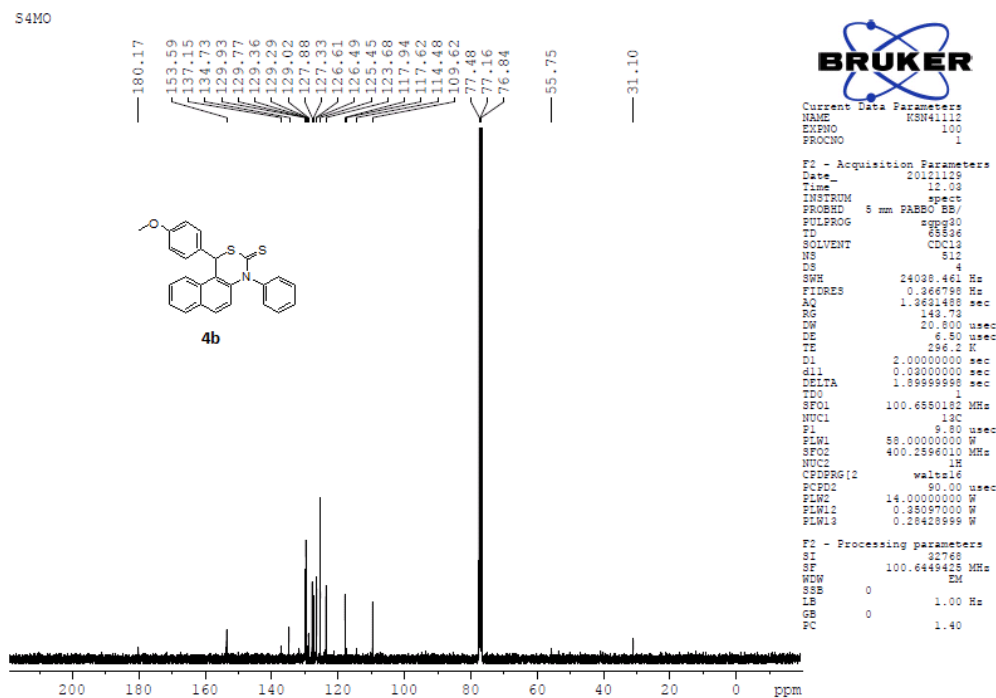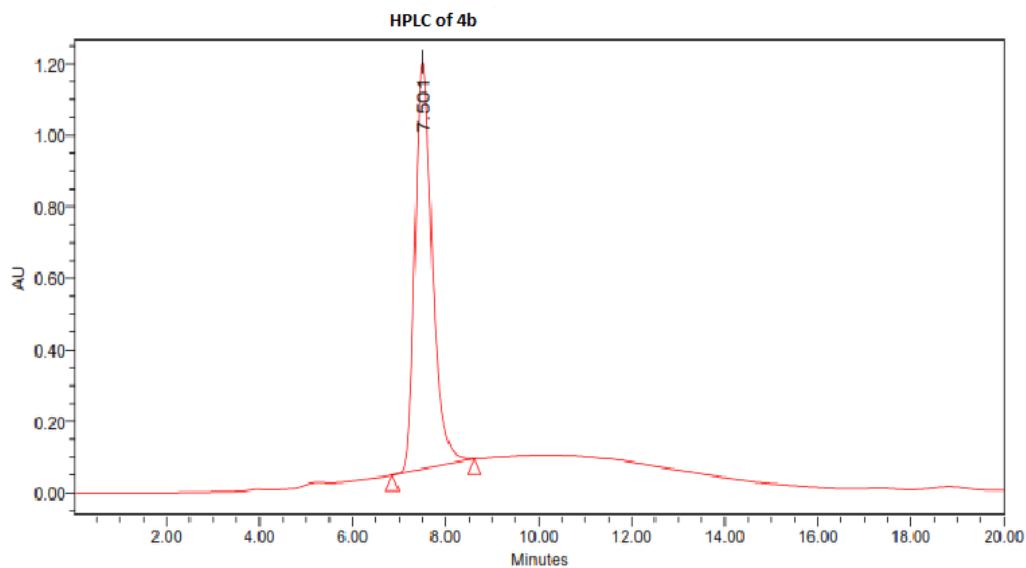

**Peak Results**

| Name | RT    | % Area | Area     |
|------|-------|--------|----------|
| 1    | 7.501 | 100.00 | 29134506 |

### <sup>1</sup>H NMR of compound (4c):

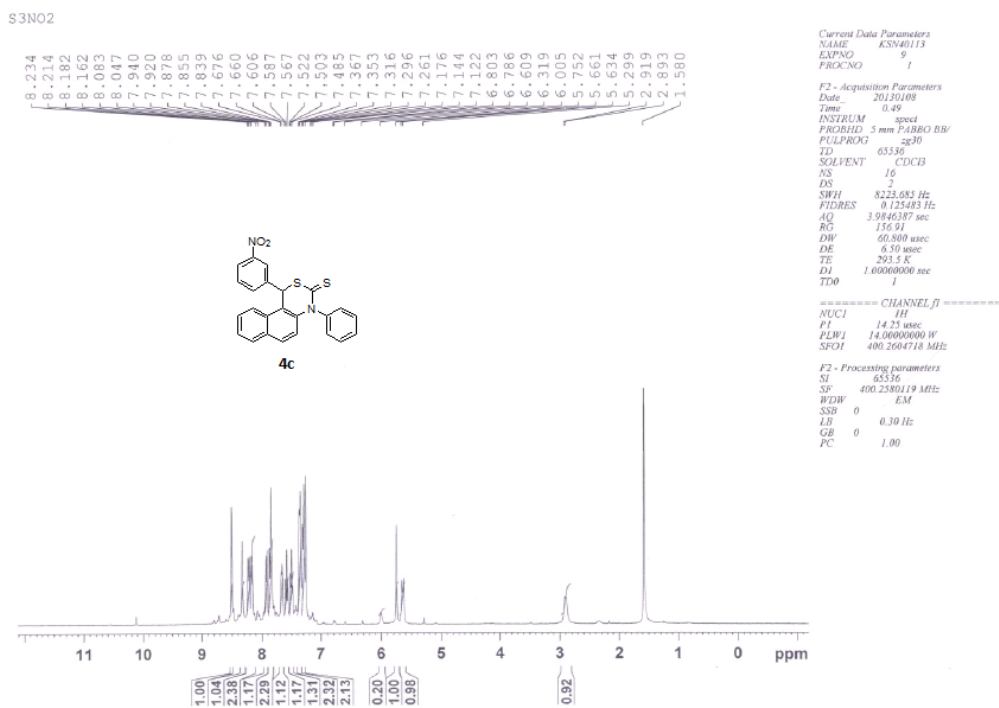

### <sup>13</sup>C NMR of compound (4c):

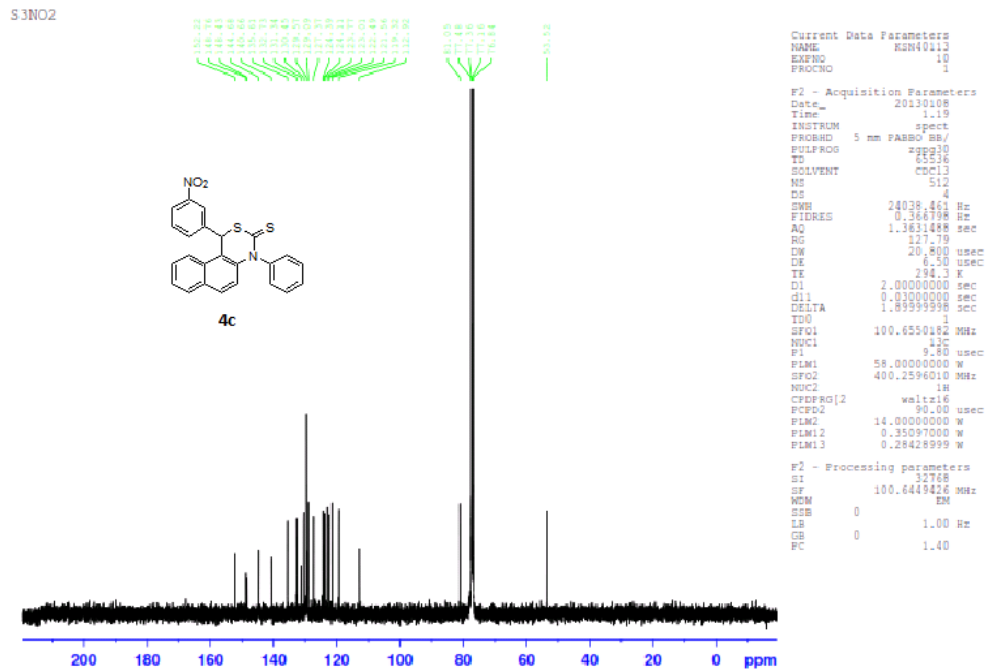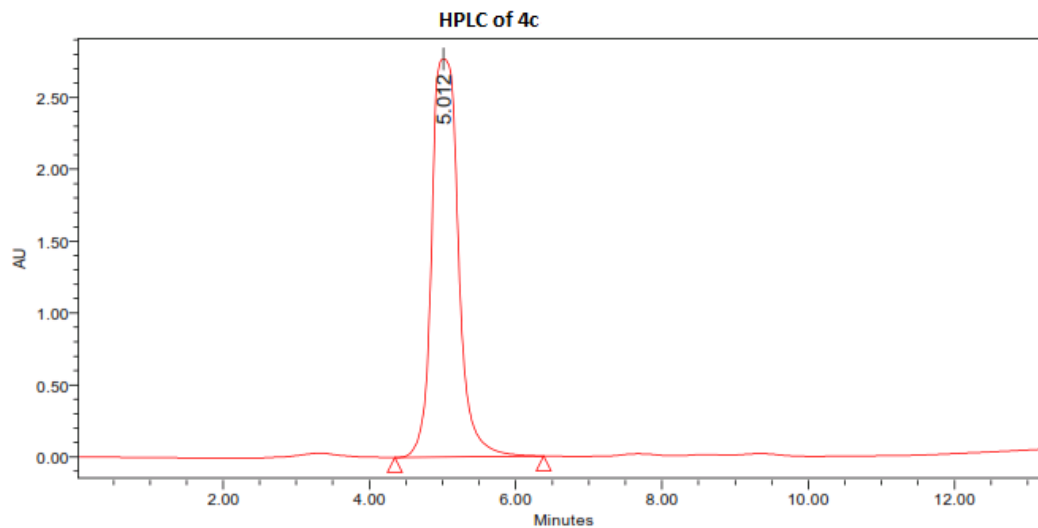

#### Peak Results

| Name | RT    | Area     | Height  | Amount | Units |
|------|-------|----------|---------|--------|-------|
| 1    | 5.012 | 70421887 | 2771599 |        |       |

### <sup>1</sup>H NMR of compound (4d):

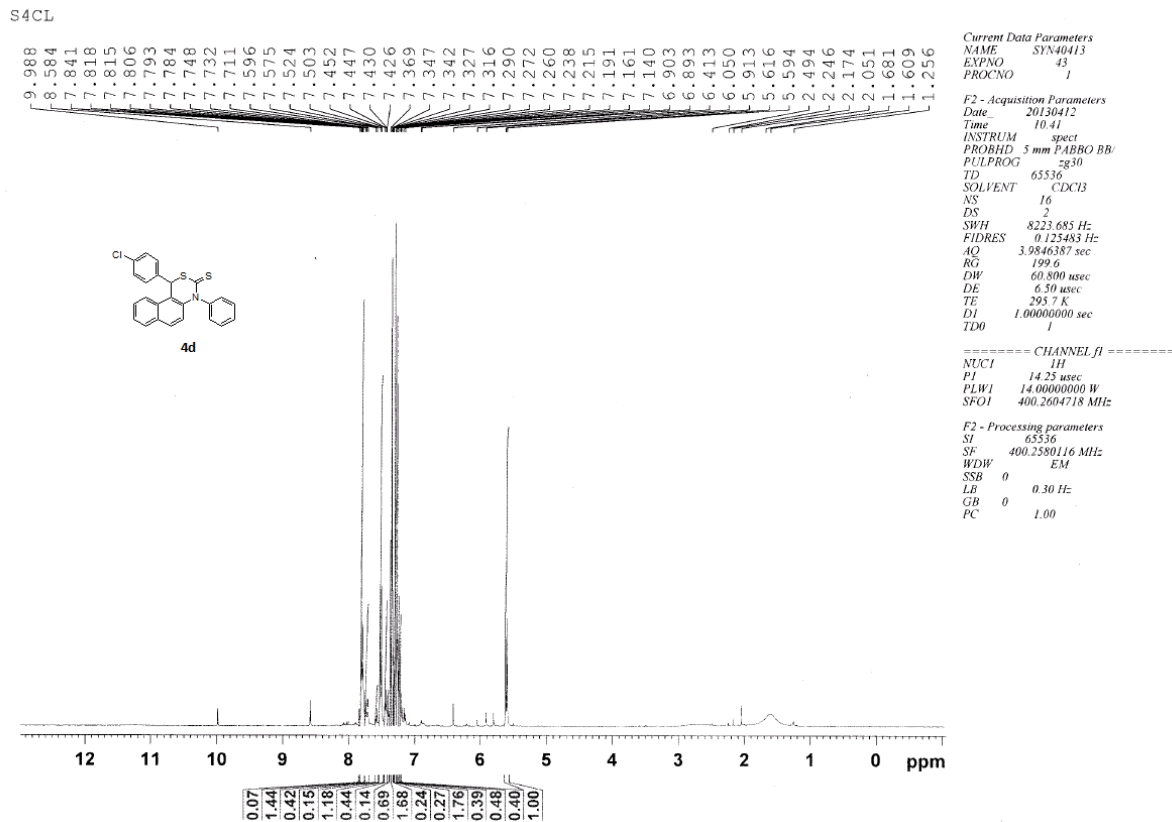



### <sup>13</sup>C NMR of compound (4d):

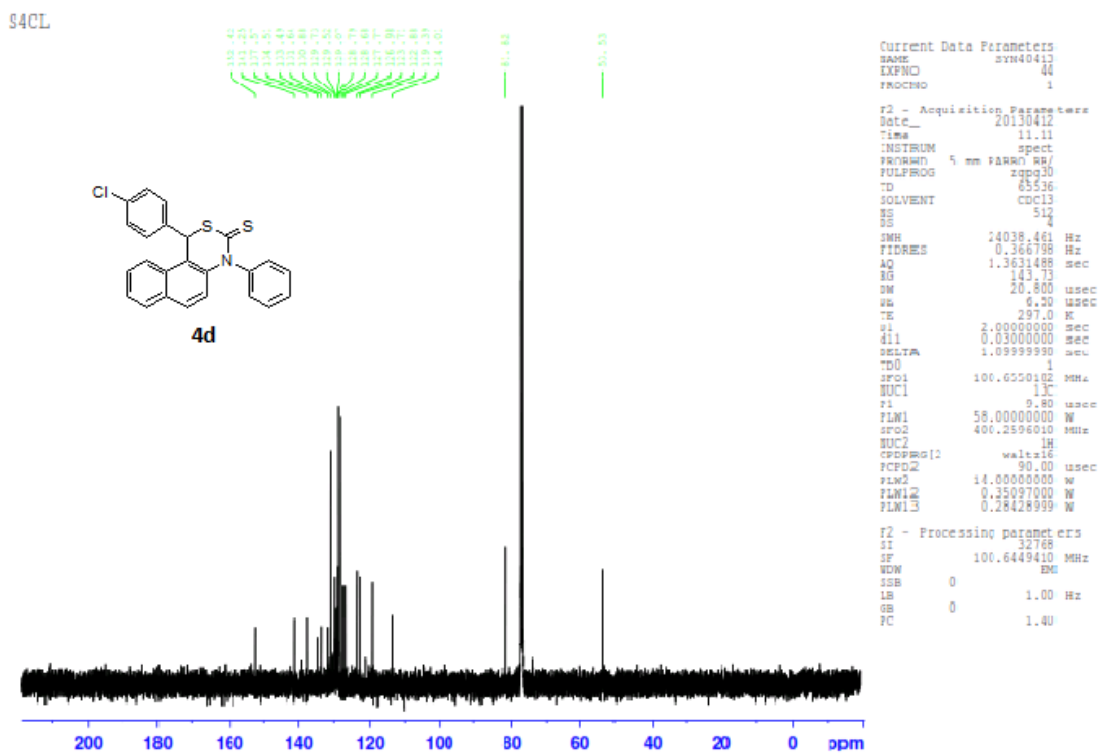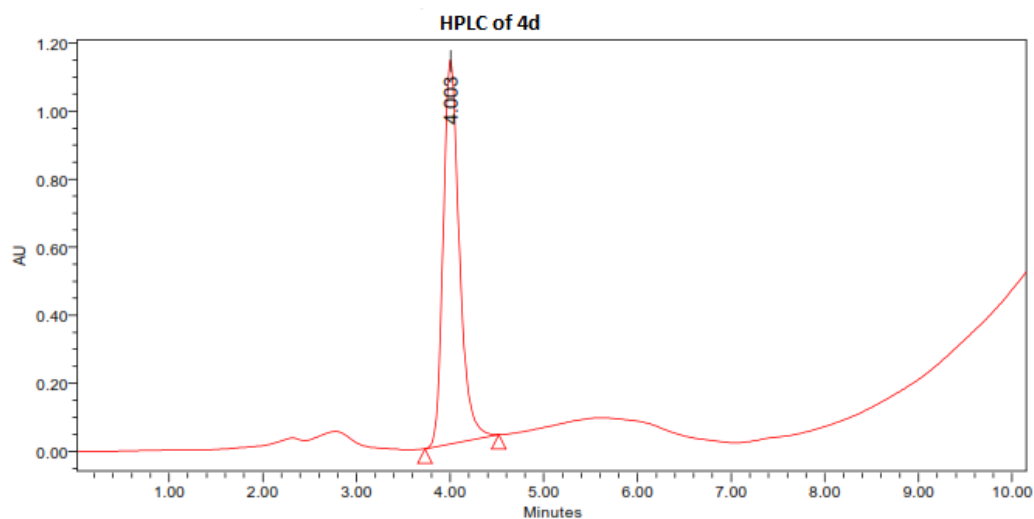

**Peak Results**

| RT      | % Area | Area     |
|---------|--------|----------|
| 1 4.003 | 100.00 | 13442928 |

### <sup>1</sup>H NMR of compound (4e):

S4CN

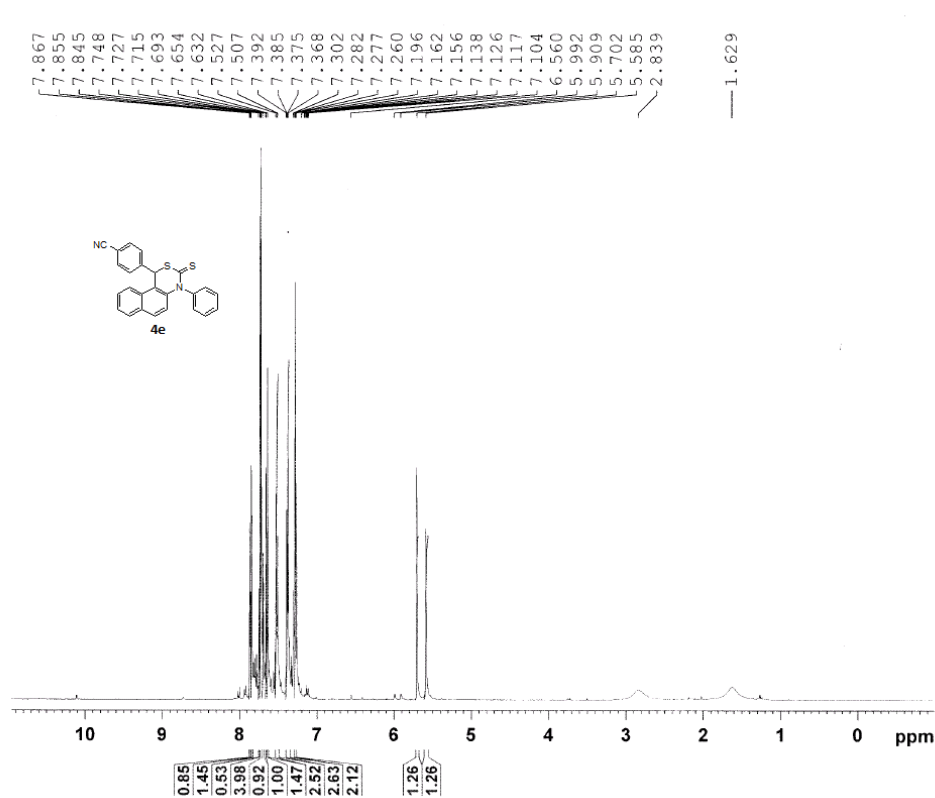

Current Data Parameters  
NAME: S1N40413  
EXPNO: 51  
PROCNO: 1

F2 - Acquisition Parameters  
Date\_: 20130417  
Time: 12.19  
INSTRUM: spect  
PROBHD: 5 mm PABBO BB/  
PULPROG: zg30  
TD: 65336  
SOLVENT: CDCl3  
NS: 16  
DS: 2  
SWH: 8223.685 Hz  
FIDRES: 0.125483 Hz  
AQ: 3.9846387 sec  
RG: 143.73  
CW: 60.800 usec  
DE: 6.50 usec  
TE: 294.9 K  
DI: 1.00000000 sec  
TDO: 1

==== CHANNEL f1 =====  
NUC1: 1H  
P1: 14.25 usec  
PLW1: 14.00000000 W  
SFO1: 400.2604718 MHz

F2 - Processing parameters  
SI: 65336  
SF: 400.2580049 MHz  
WDW: EM  
SSB: 0  
LB: 0.30 Hz  
GB: 0  
PC: 1.00

**<sup>13</sup>C NMR of compound (4e):**

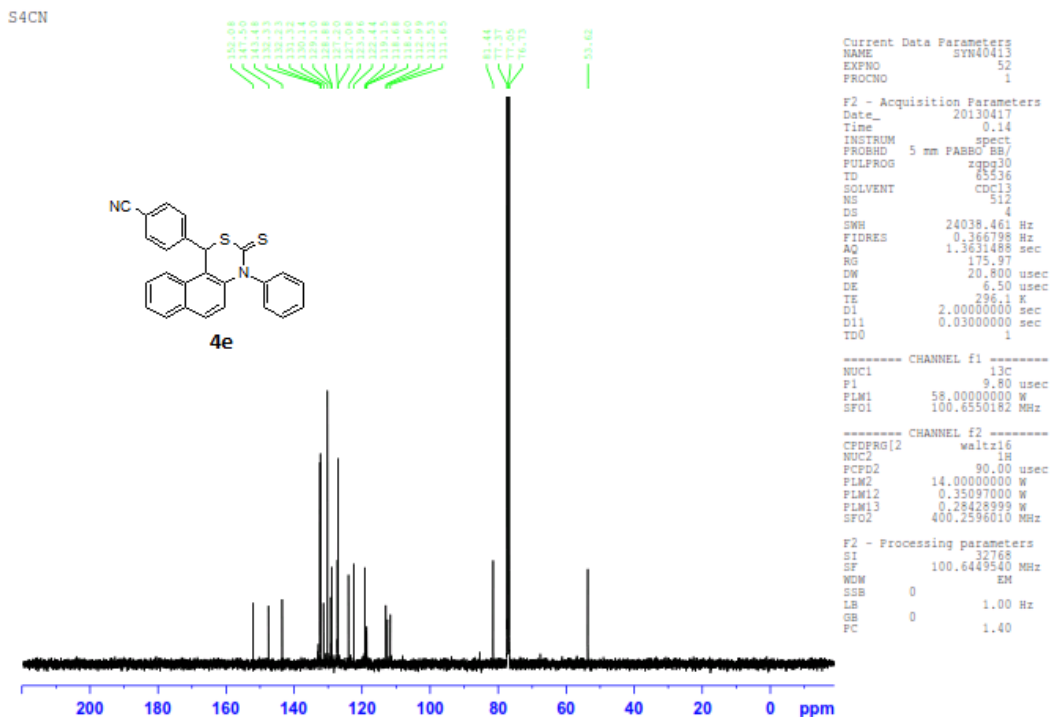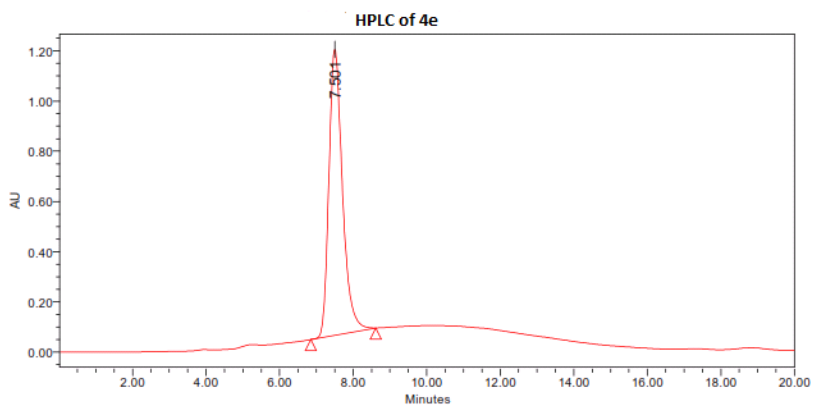

**Peak Results**

| Name | RT    | % Area | Area     |
|------|-------|--------|----------|
| 1    | 7.501 | 100.00 | 29134506 |

### <sup>1</sup>H NMR of compound (4f):

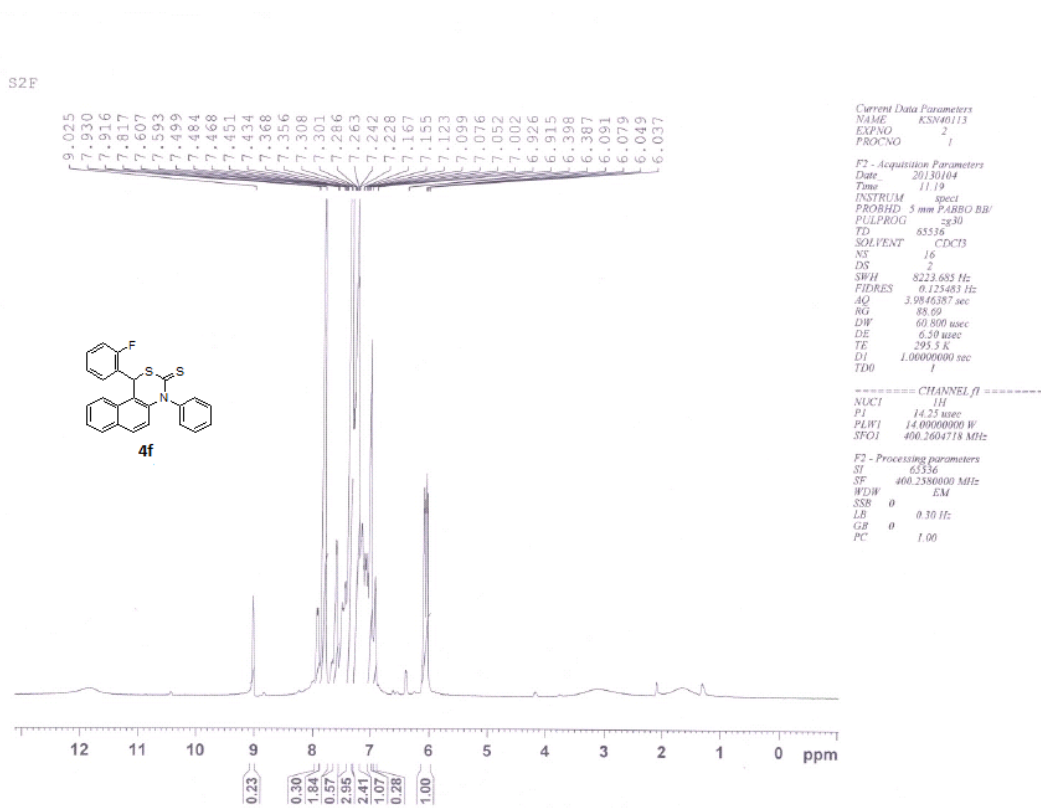

**<sup>13</sup>C NMR of compound (4f):**

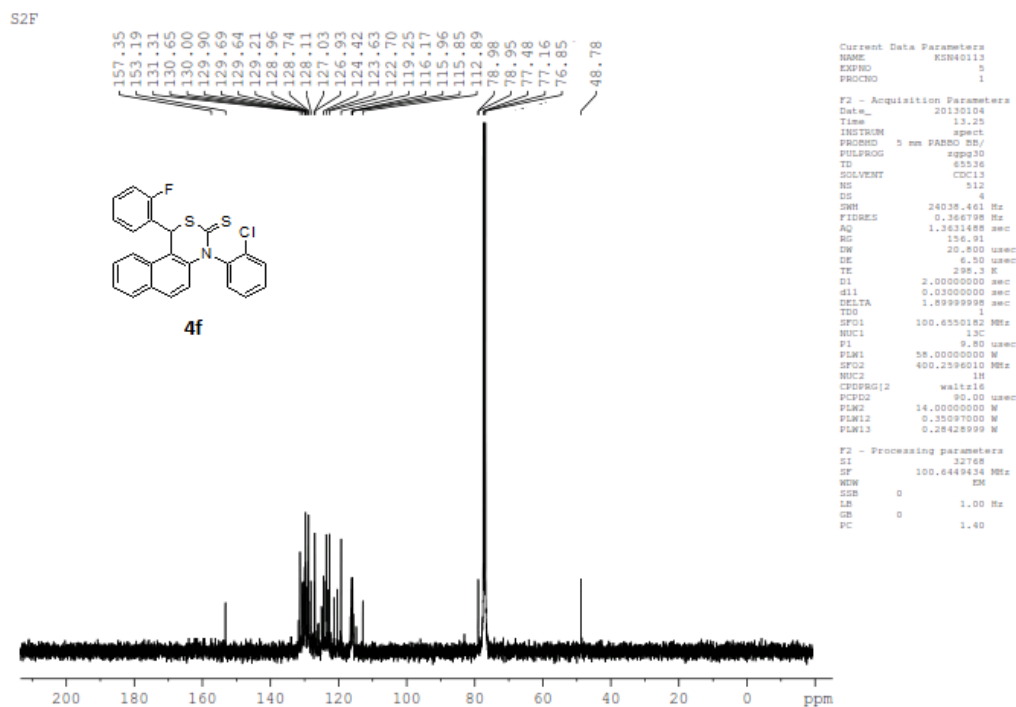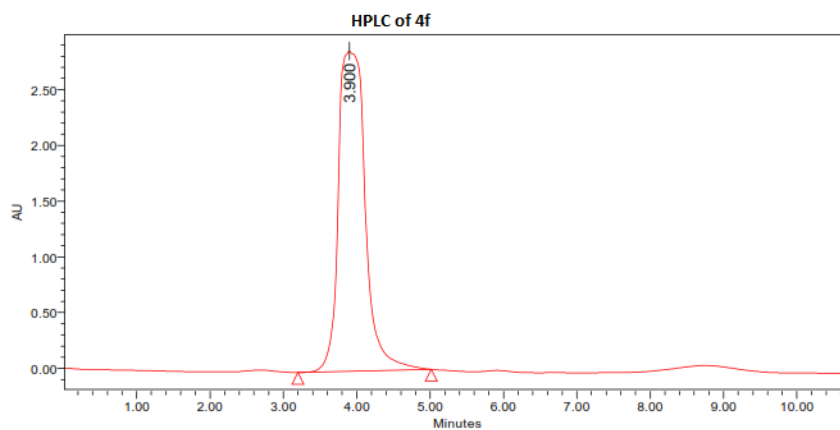

**Peak Results**

| Name | RT    | % Area | Area     |
|------|-------|--------|----------|
| 1    | 3.900 | 100.00 | 73105602 |

**<sup>1</sup>H NMR of compound (4g):**

S4ME

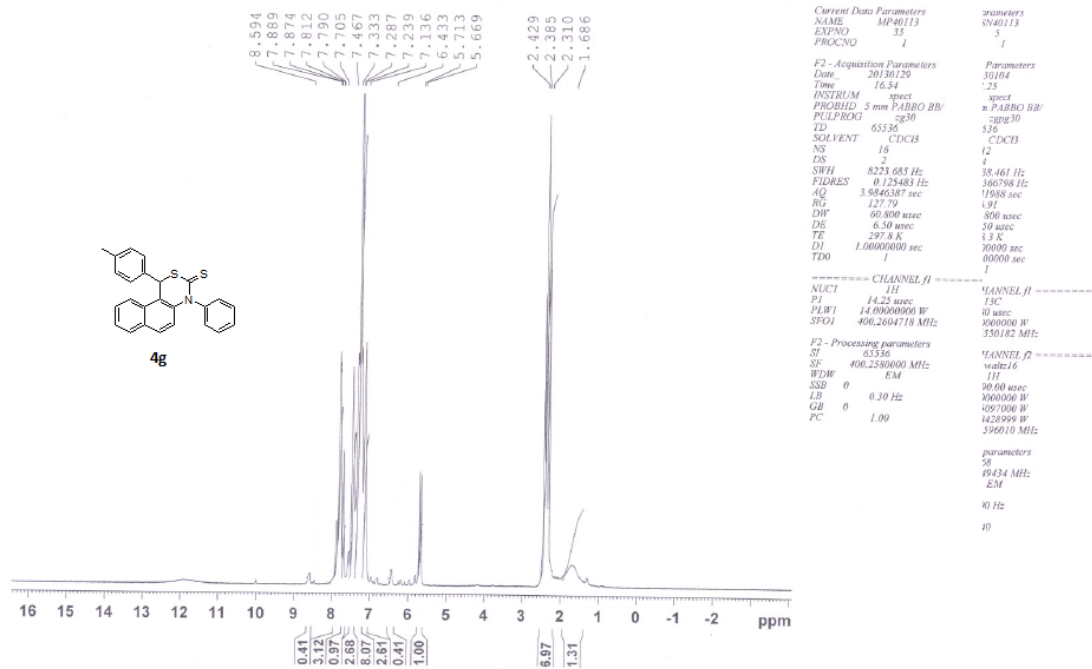

### <sup>13</sup>C NMR of compound (4g):

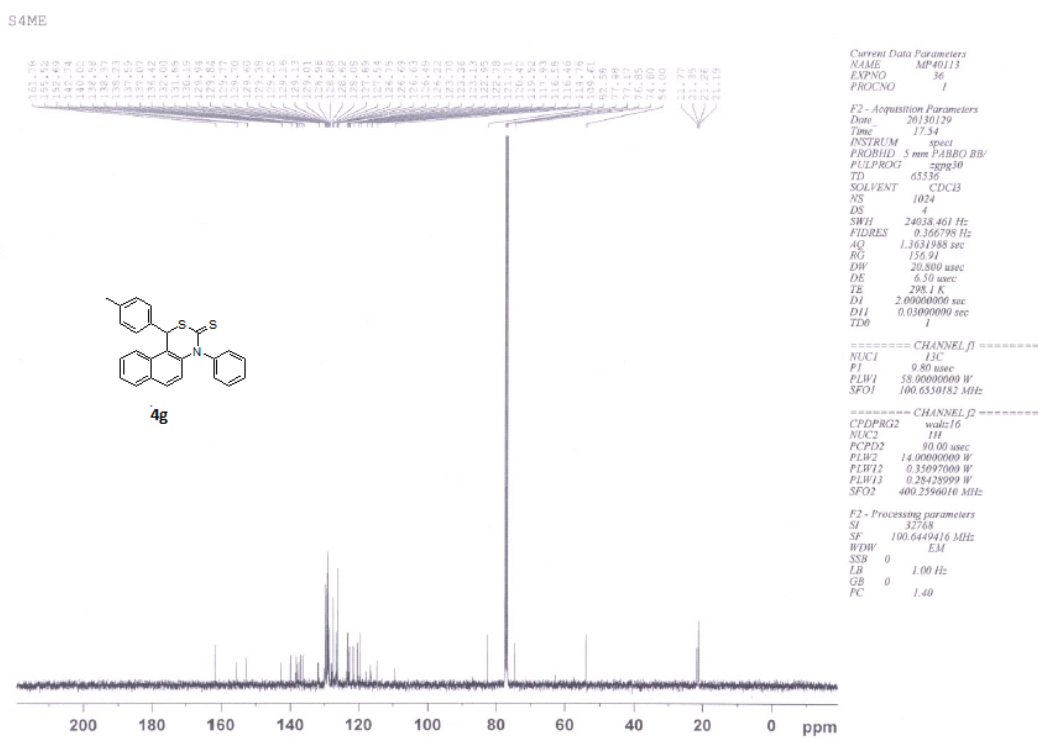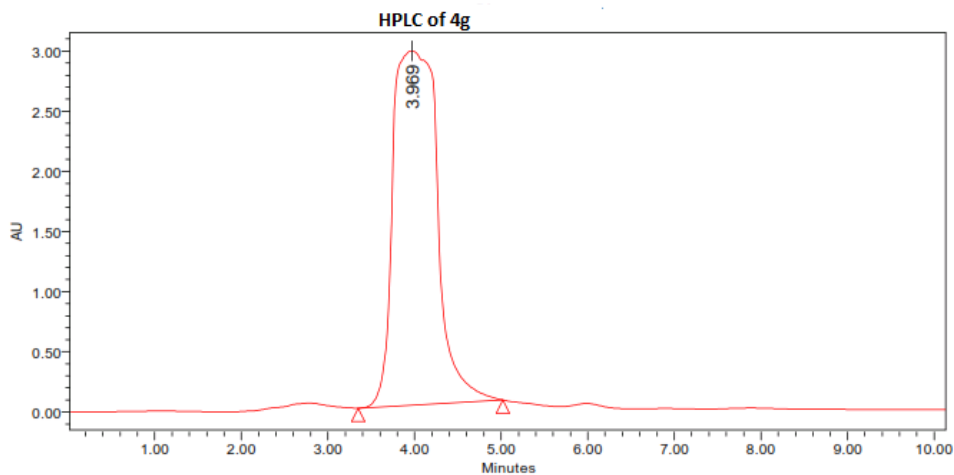

**Peak Results**

| Name | RT    | % Area | Area      |
|------|-------|--------|-----------|
| 1    | 3.969 | 100.00 | 104777317 |

### <sup>1</sup>HNMR of compound (4h):

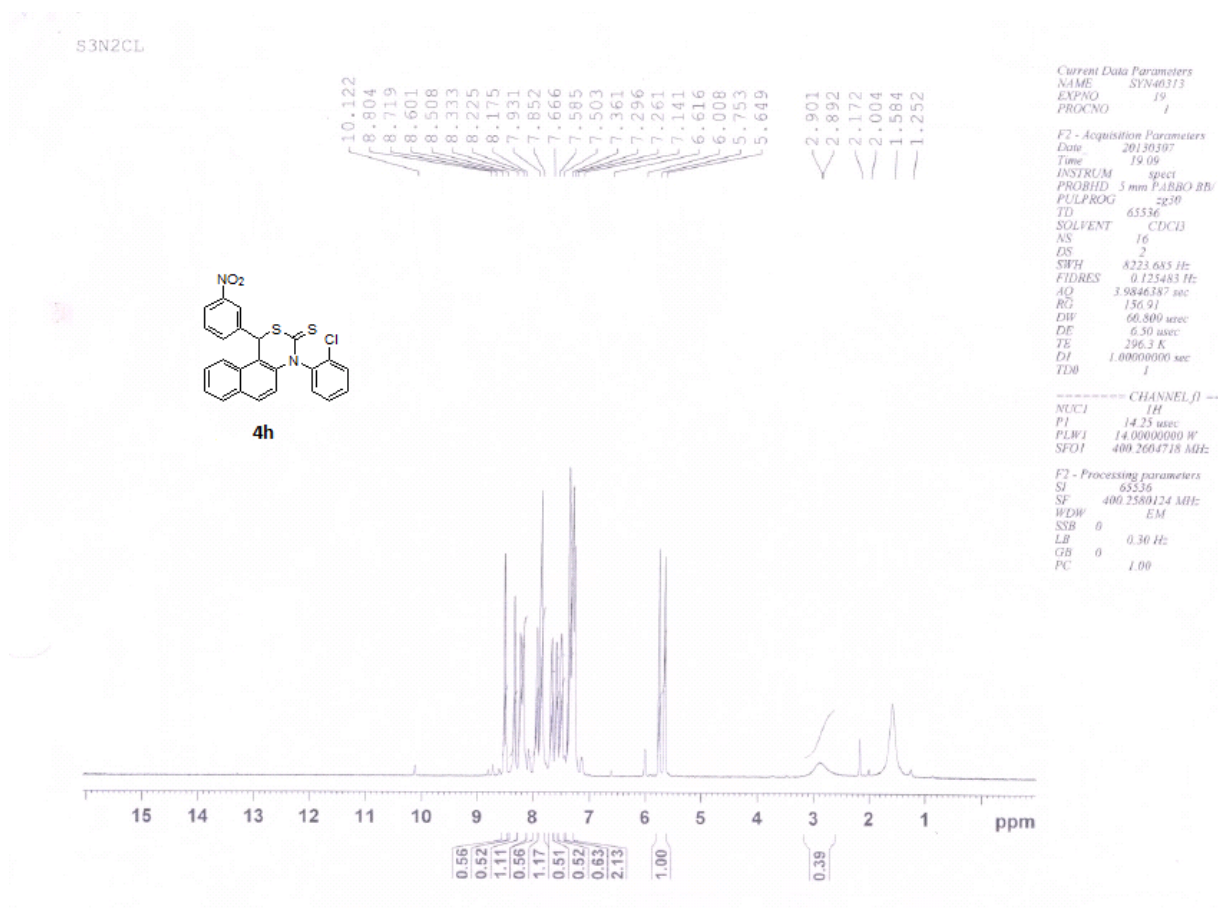



**<sup>13</sup>C NMR of compound (4h):**

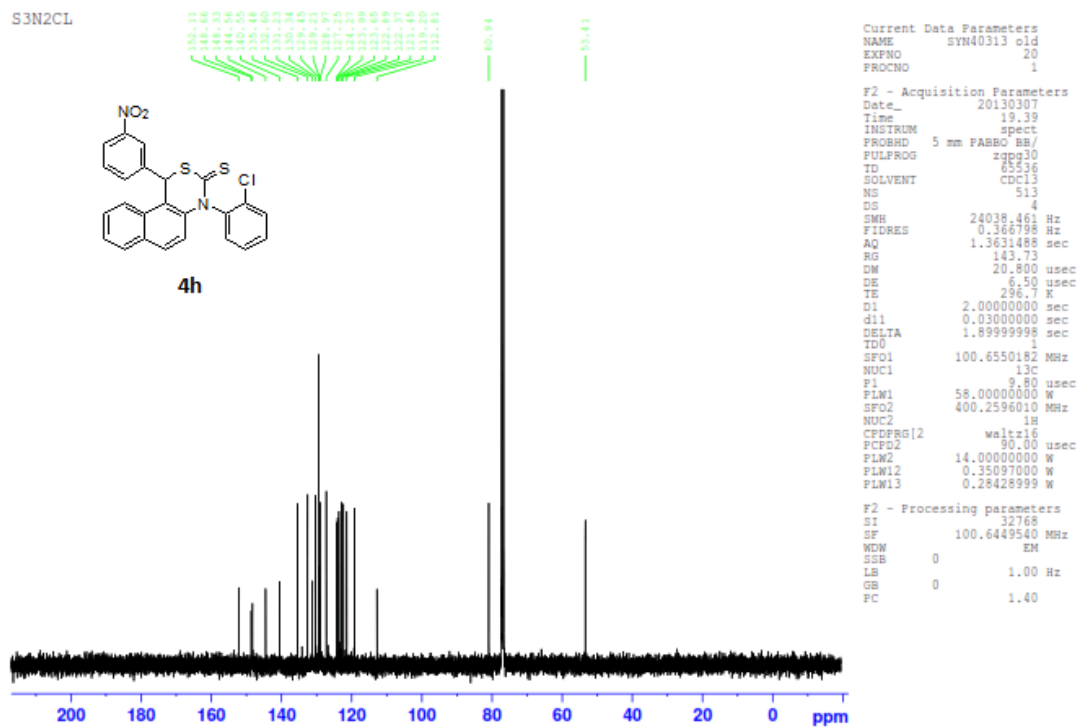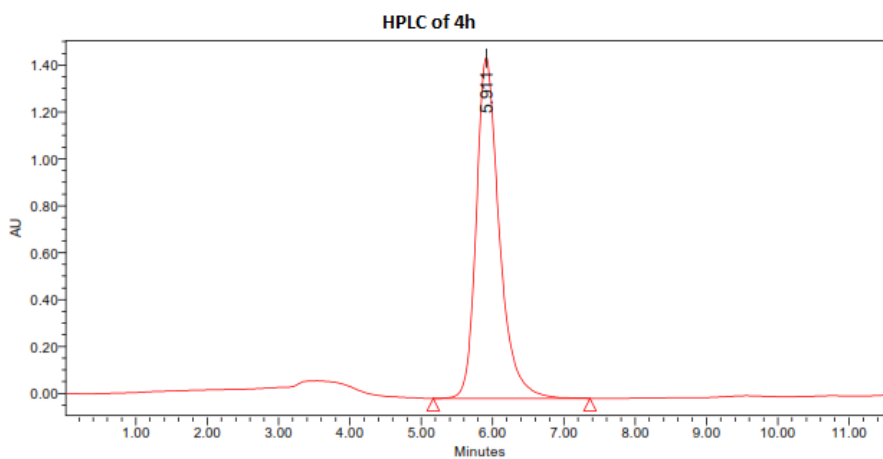

**Peak Results**

| RT      | % Area | Area     |
|---------|--------|----------|
| 1 5.911 | 100.00 | 32576688 |

### <sup>1</sup>H NMR of compound (4i):

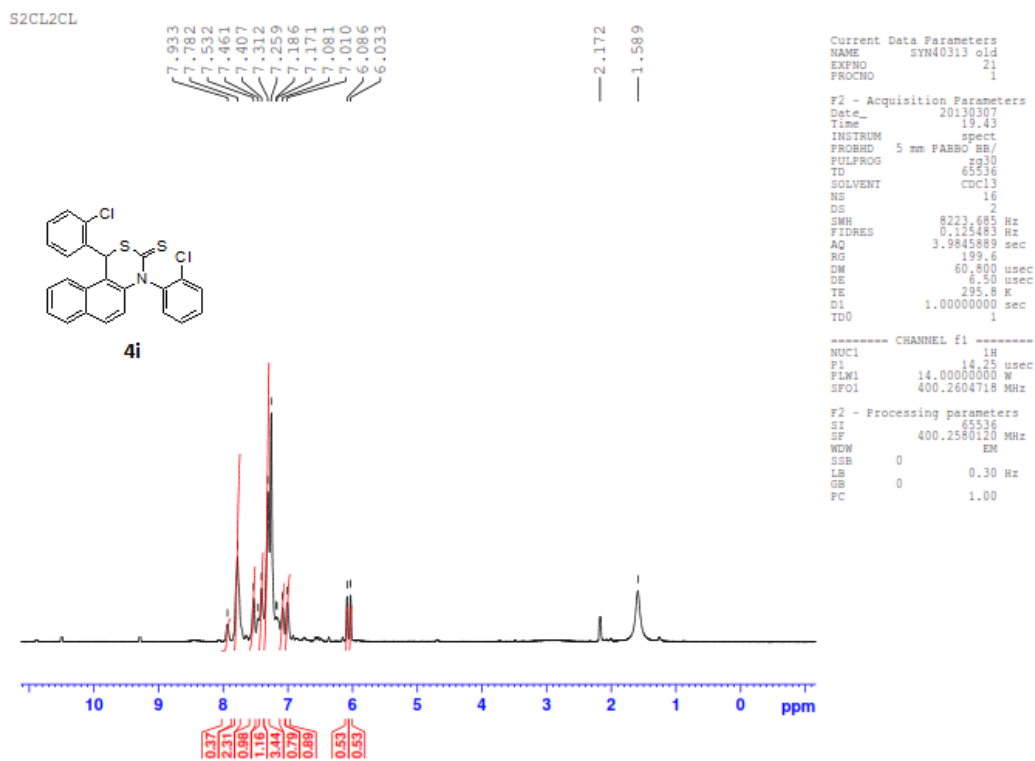

### <sup>13</sup>C NMR of compound (4i):

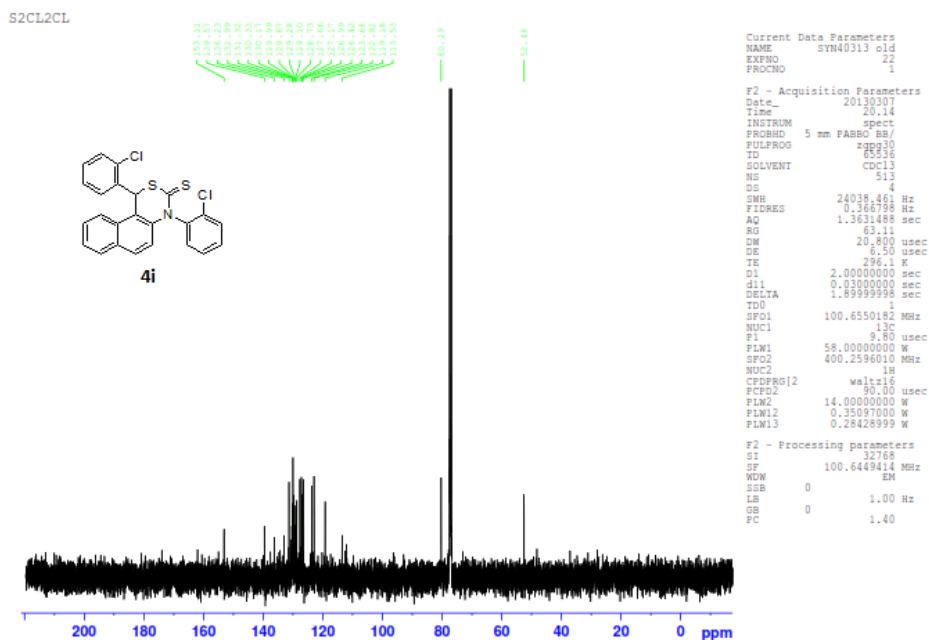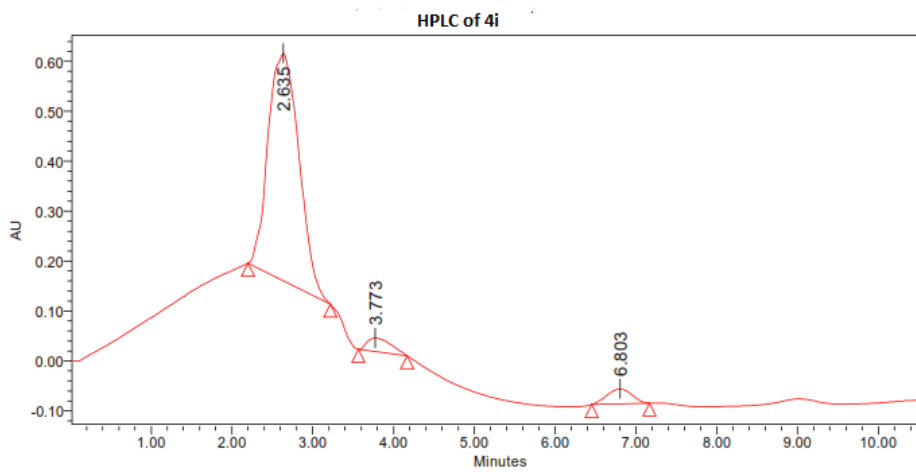

Peak Results

| Name | RT    | % Area | Area     |
|------|-------|--------|----------|
| 1    | 2.635 | 90.86  | 12076290 |
| 2    | 3.773 | 4.32   | 574207   |
| 3    | 6.803 | 4.82   | 641312   |

### <sup>1</sup>H NMR of compound (4j):

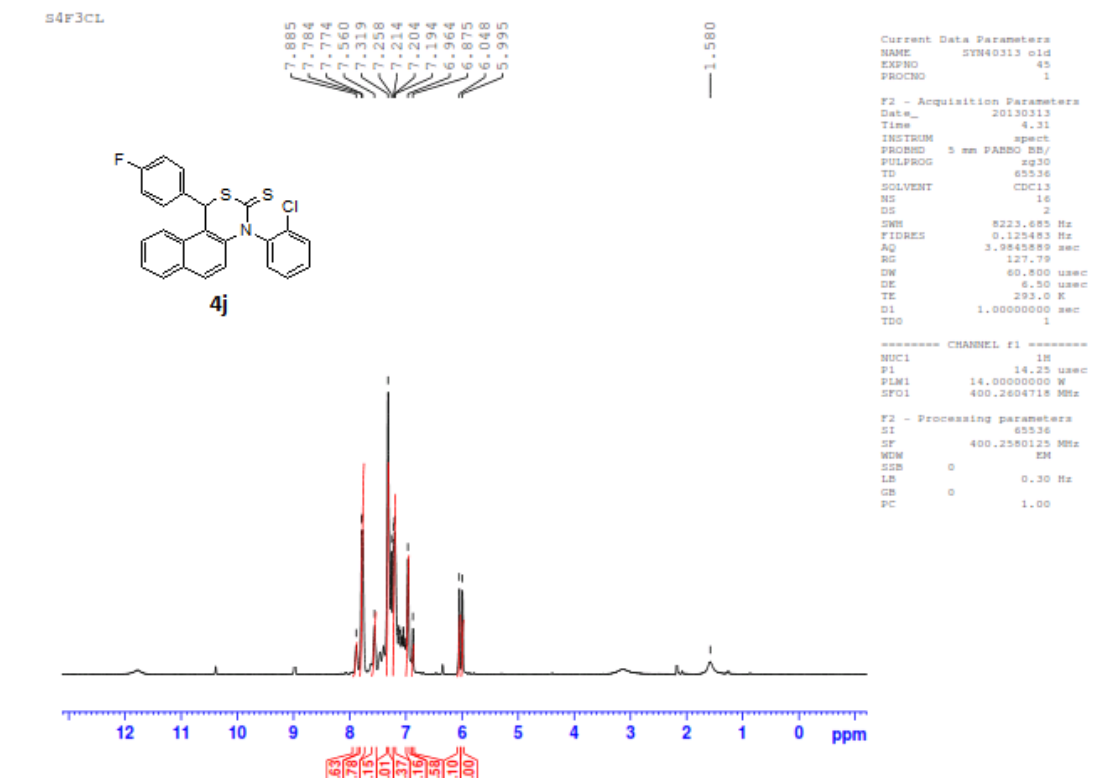



### <sup>1</sup>H NMR of compound (4k):

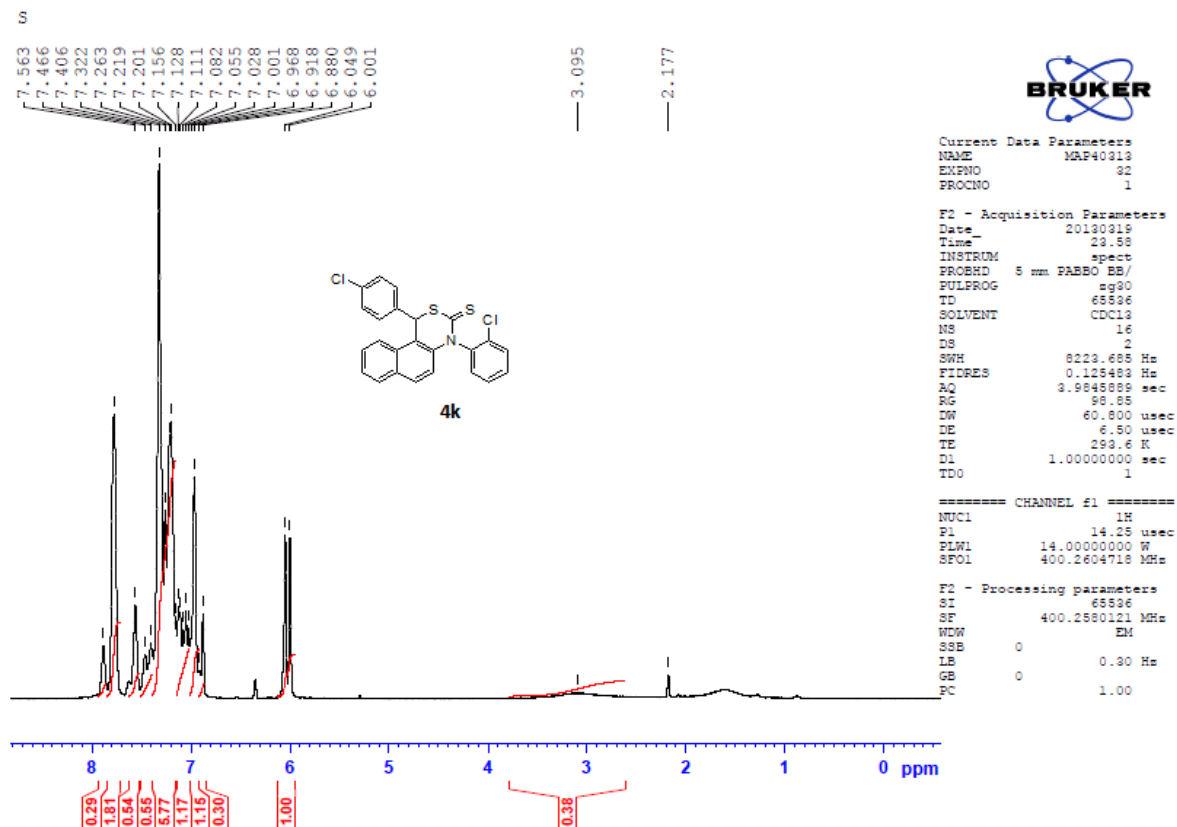

<sup>13</sup>C NMR of compound (4k):

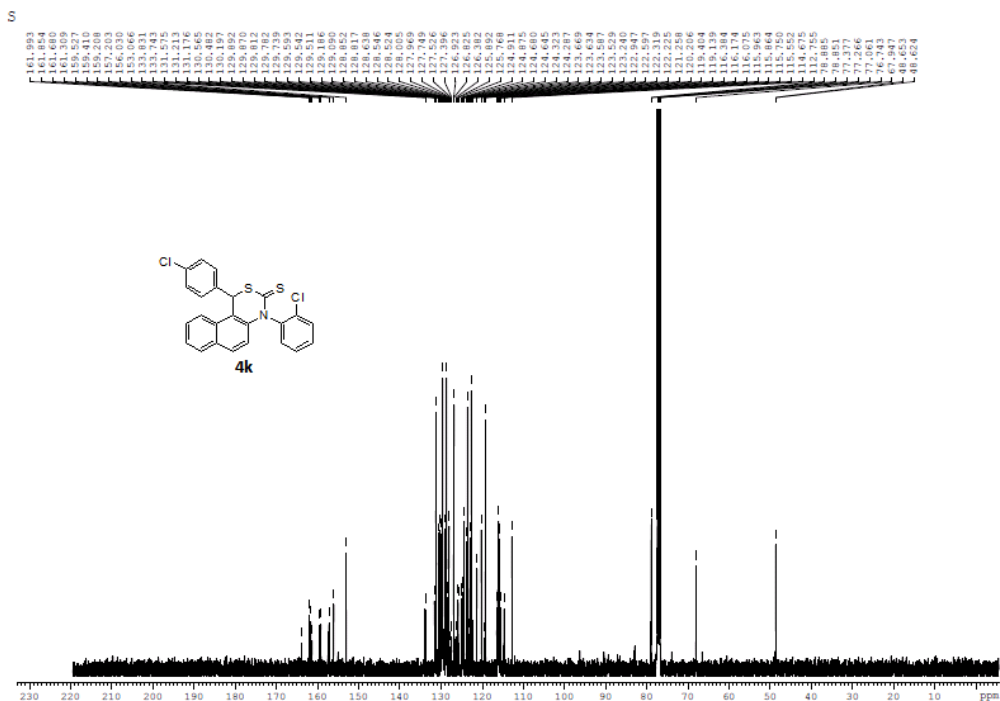

HPLC of 4k

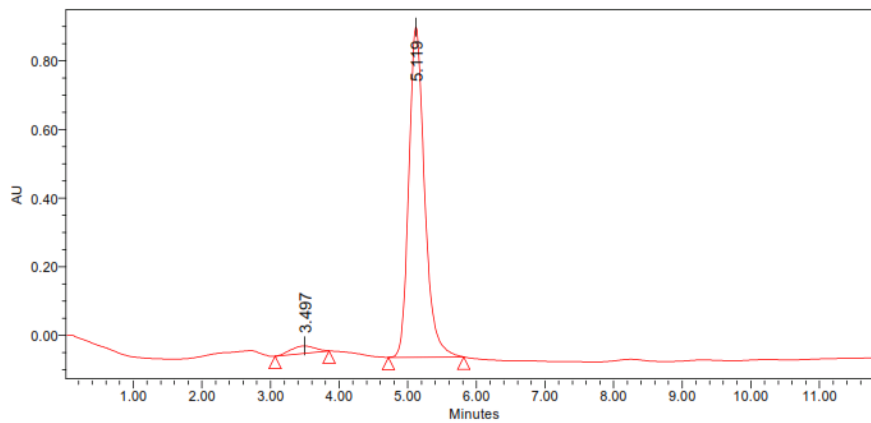

Peak Results

| Name | RT    | % Area | Area     |
|------|-------|--------|----------|
| 1    | 3.497 | 3.31   | 527032   |
| 2    | 5.119 | 96.69  | 15374246 |

### <sup>1</sup>H NMR of compound (4I):

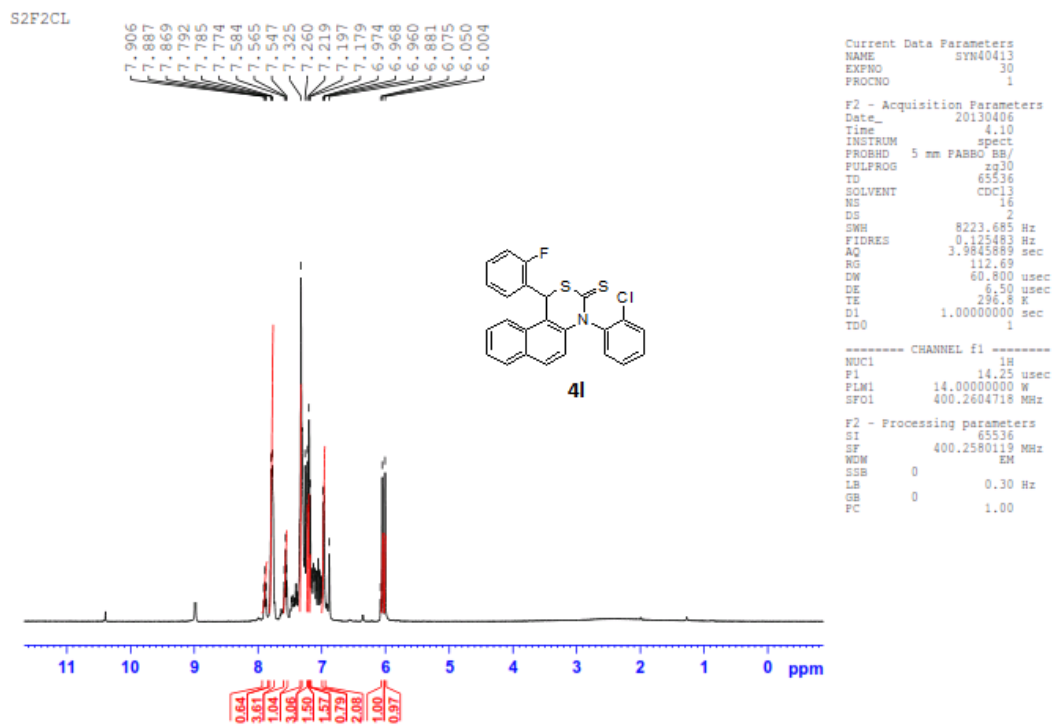



### <sup>13</sup>C NMR of compound (4I):

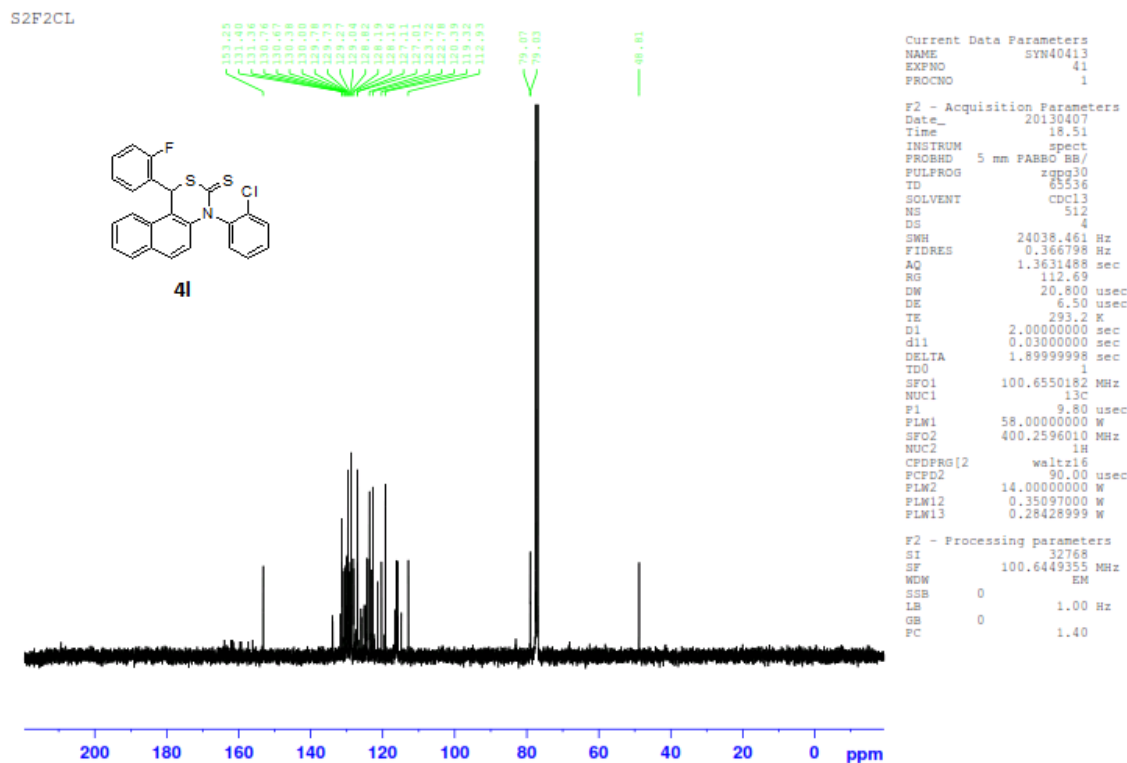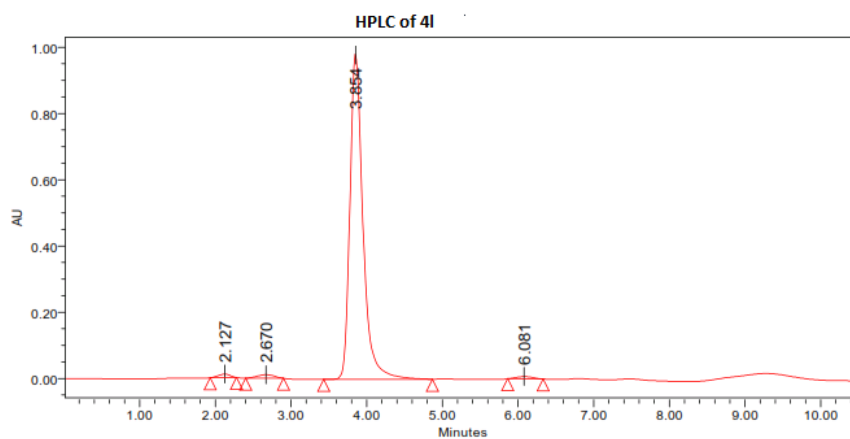

**Peak Results**

| Name | RT    | % Area | Area     |
|------|-------|--------|----------|
| 1    | 2.127 | 0.97   | 118300   |
| 2    | 2.670 | 1.39   | 168529   |
| 3    | 3.854 | 96.76  | 11751360 |
| 4    | 6.081 | 0.88   | 106507   |

### <sup>1</sup>H NMR of compound (4m):

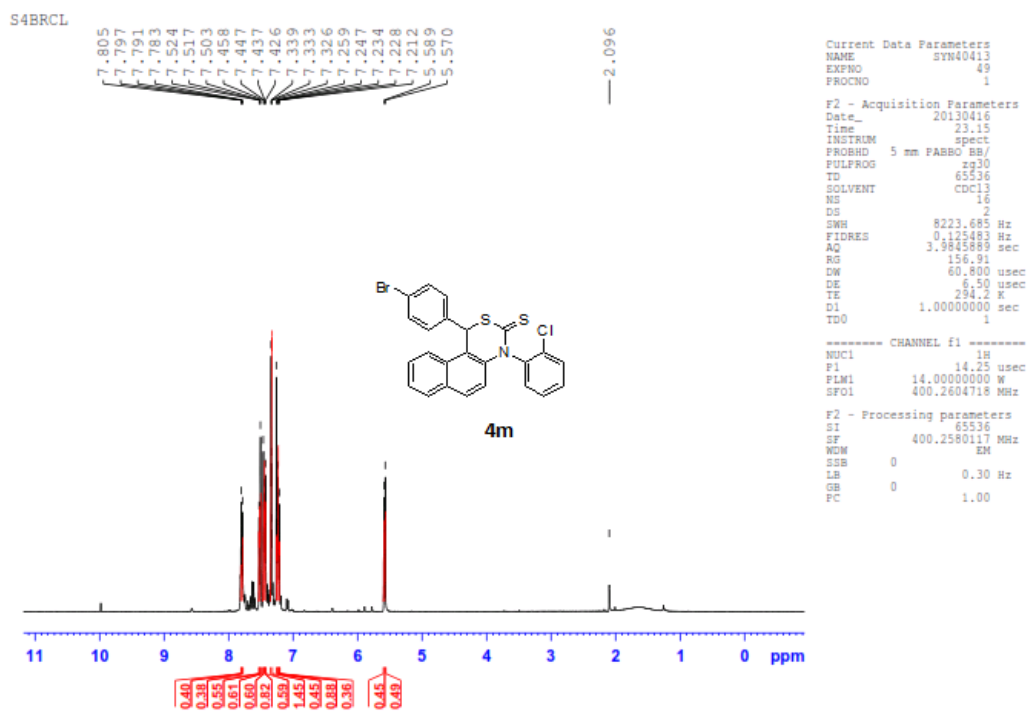

### <sup>13</sup>C NMR of compound (4m):

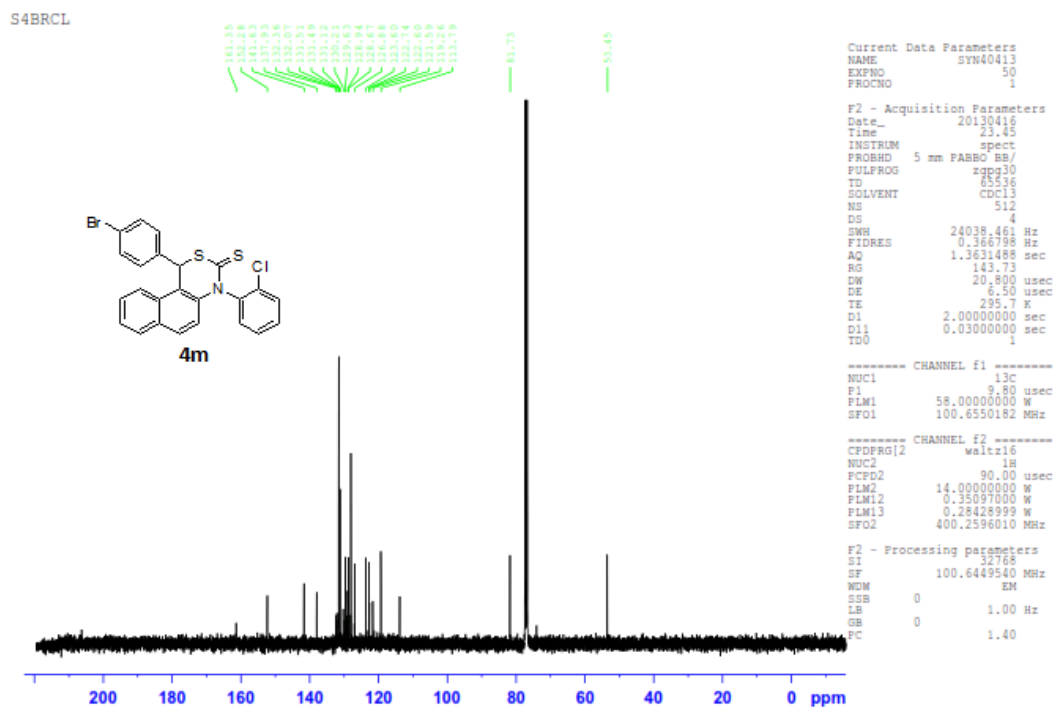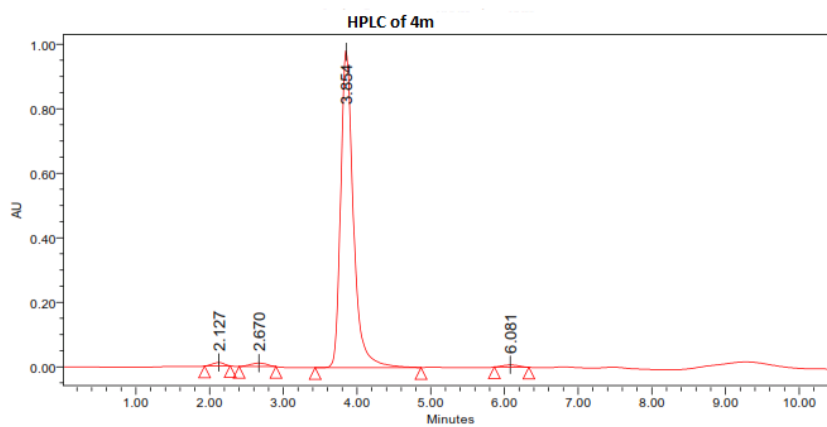

Peak Results

| Name | RT    | % Area | Area     |
|------|-------|--------|----------|
| 1    | 2.127 | 0.97   | 118300   |
| 2    | 2.670 | 1.39   | 168529   |
| 3    | 3.854 | 96.76  | 11751360 |
| 4    | 6.081 | 0.88   | 106507   |

### <sup>1</sup>H NMR of compound (4n):

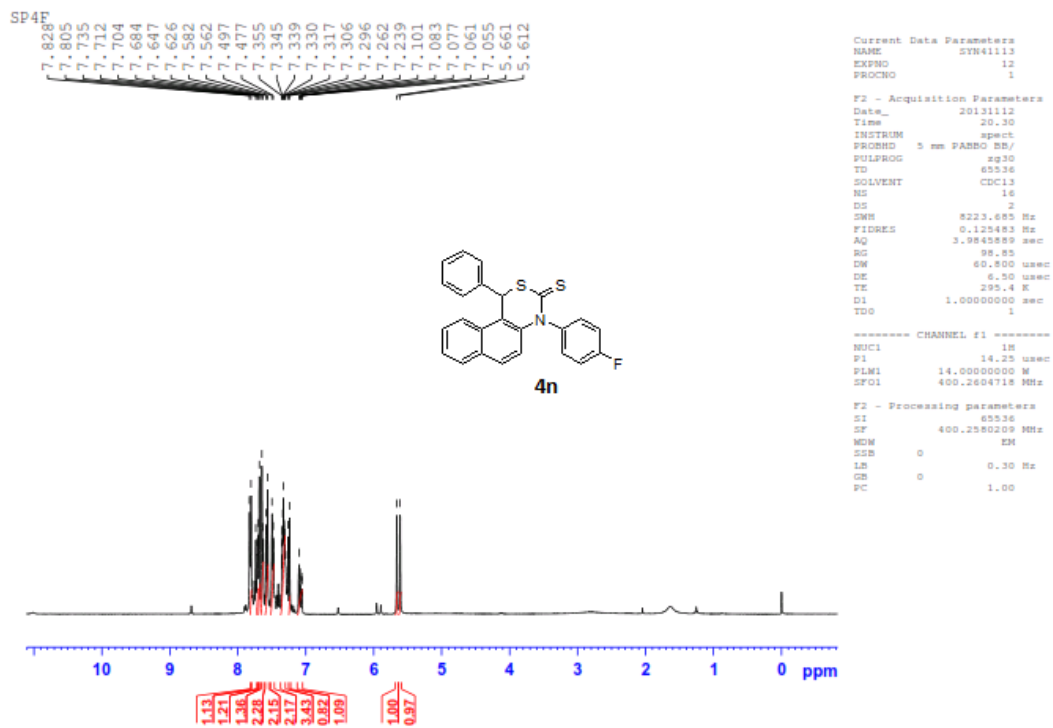



### <sup>1</sup>HNMR of compound (40):

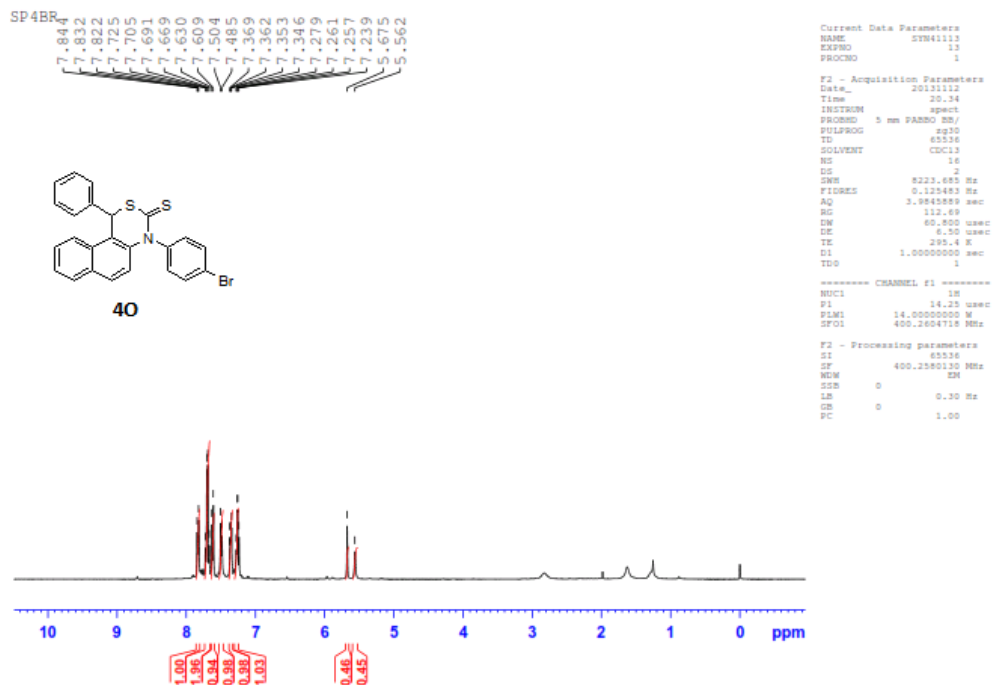



### <sup>1</sup>H NMR of compound (4p):

SP4CL

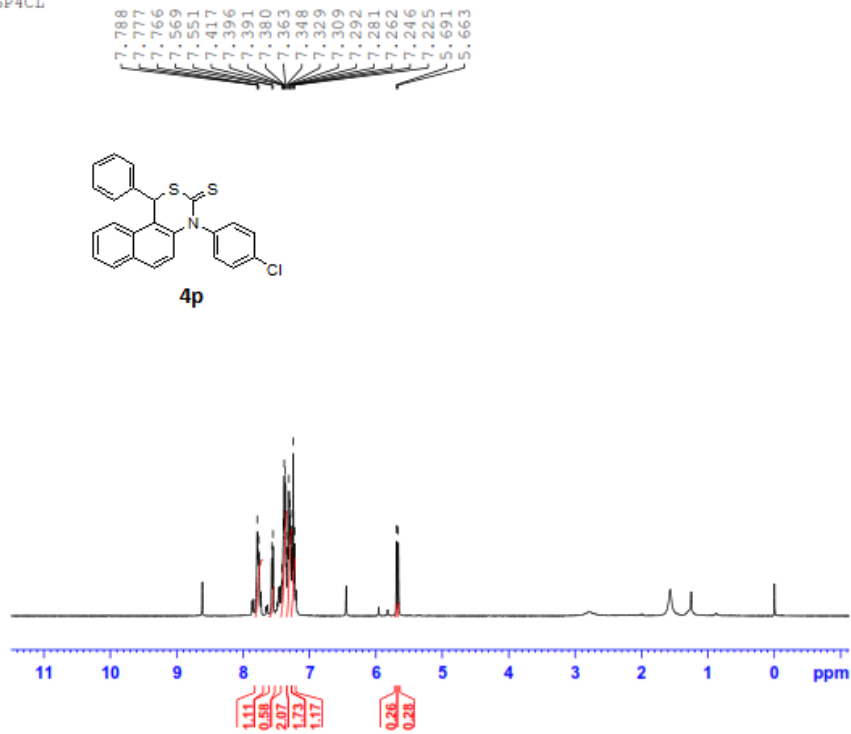

```
Current Data Parameters
NAME      SP4CL113
EXPNO    11
PROCNO   1

F2 - Acquisition Parameters
Date_    20131112
Time     20.26
INSTRUM  spect
PROBHD   5 mm F400 BB/
PULPROG  zg30
TD        65536
SOLVENT  CDCl3
NS        16
DS        2
SWH       8223.685 Hz
FIDRES    0.125483 Hz
AQ        3.9845859 sec
RG        127.79
DW        60.800 usec
DE        6.50 usec
TE        299.3 K
D1        1.00000000 sec
TDO       1

----- CHANNEL f1 -----
NUC1      1H
P1        14.25 usec
P1M1     14.0000000 M
SFO1     400.2604718 MHz

F2 - Processing parameters
SI        65536
SF        400.2580175 MHz
WDW       EM
SSB       0
LB        0.30 Hz
GB        0
PC        1.00
```



### <sup>13</sup>C NMR of compound (4p):

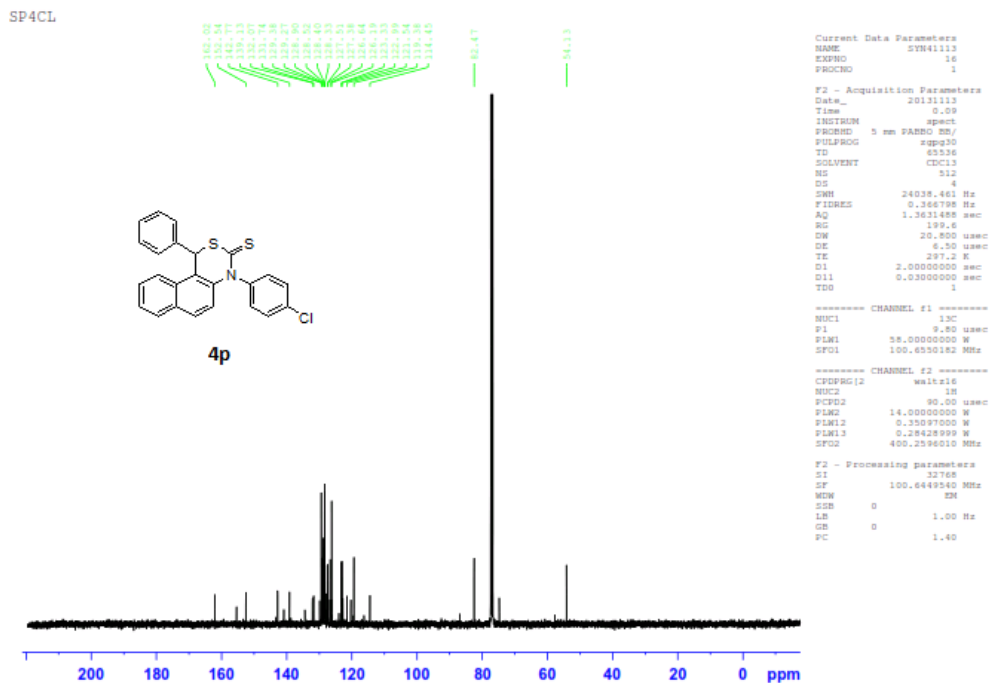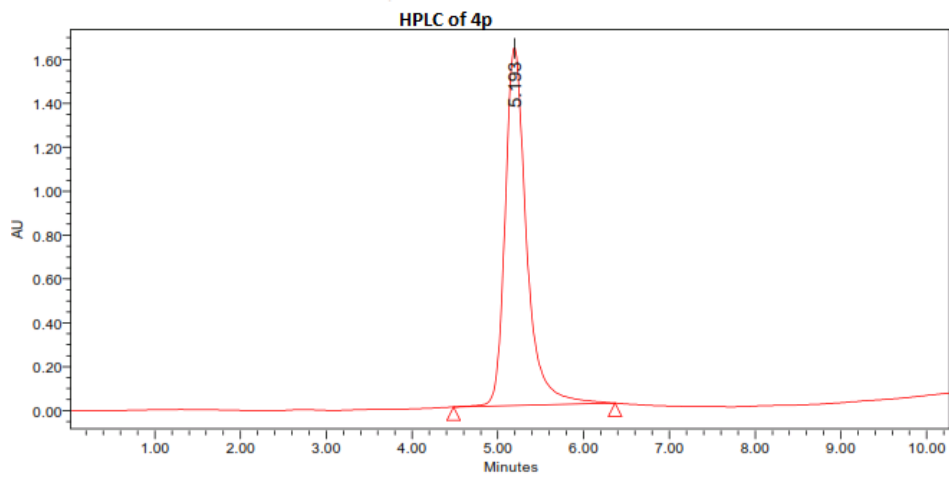

**Peak Results**

| Name | RT    | % Area | Area     |
|------|-------|--------|----------|
| 1    | 5.193 | 100.00 | 28247471 |

### <sup>1</sup>HNMR of compound (4q):

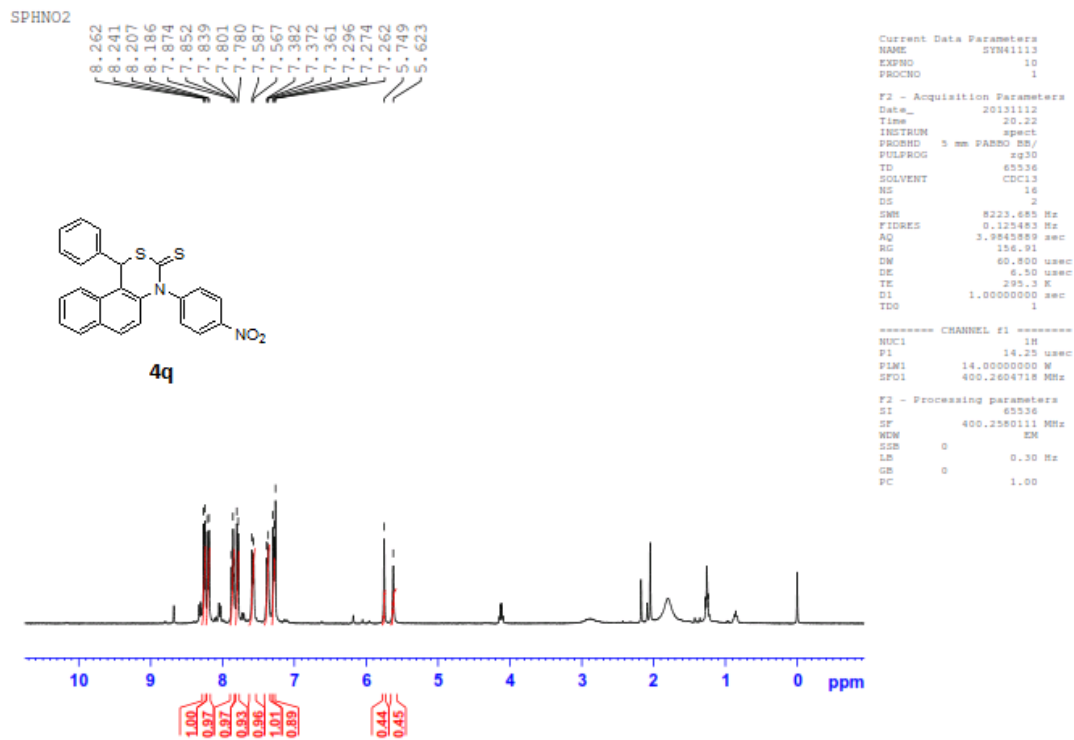

### <sup>13</sup>C NMR of compound (4p):

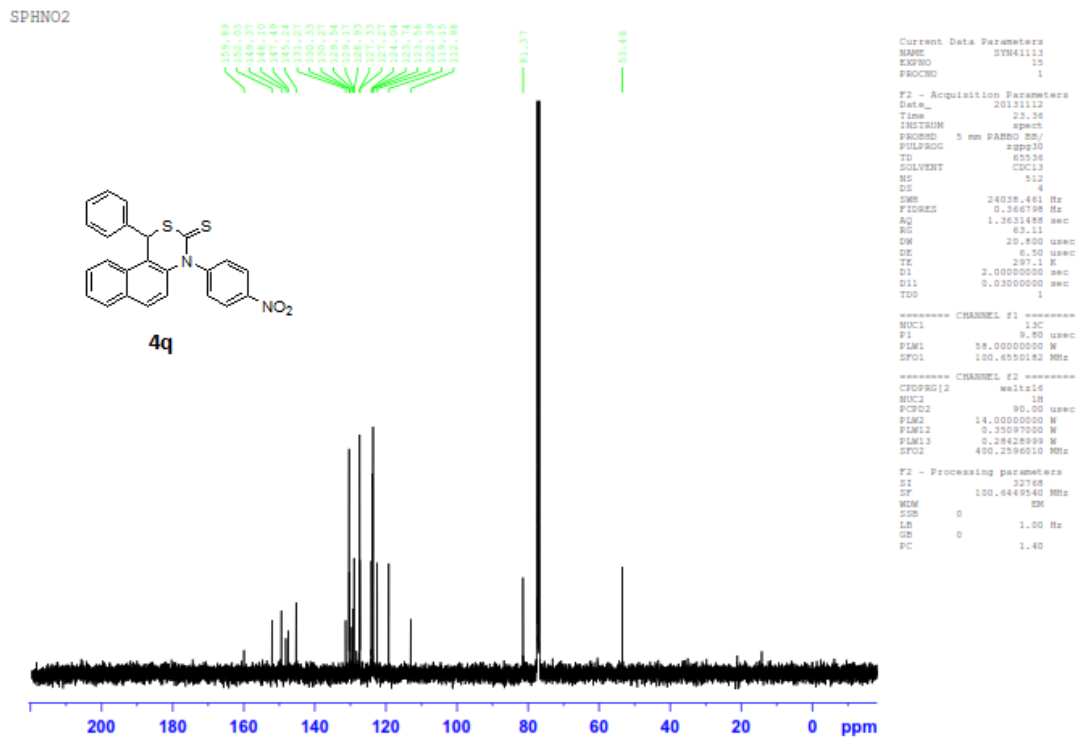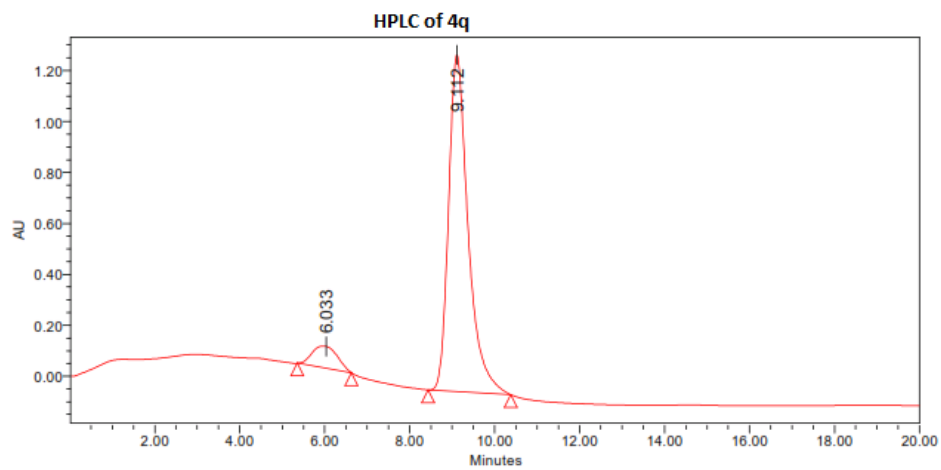

Peak Results

| Name | RT    | % Area | Area     |
|------|-------|--------|----------|
| 1    | 6.033 | 7.77   | 3554983  |
| 2    | 9.112 | 92.23  | 42168441 |
